# Supplementary material for: Migrating Huns and modified heads: Eigenshape analysis comparing intentionally modified crania from Hungary and Georgia in the Migration Period of Europe
Source: PLoS One. 2017 Feb 2;12(2):e0171064. doi: 10.1371/journal.pone.0171064 (PMC5289542; doi:10.1371/journal.pone.0171064)
Supplement: S1 File — Landmark data for each specimen. (TPS) [file pone.0171064.s001.tps]

LM=3
1152.00000 551.00000
1150.00000 752.00000
851.00000 792.00000
OUTLINES=1
POINTS=200
739 567
745 566
751 566
757 568
763 568
769 567
775 565
781 565
787 564
793 563
800 563
806 564
812 565
818 565
824 565
829 567
835 567
841 567
847 567
853 566
859 565
865 565
871 565
877 565
883 565
889 565
895 565
901 564
907 563
913 564
920 564
926 563
932 562
938 562
944 562
950 562
956 562
962 562
968 562
974 561
980 561
986 561
992 561
998 561
1004 560
1010 560
1016 561
1022 560
1028 559
1034 559
1041 558
1047 558
1053 558
1059 558
1065 558
1071 558
1077 558
1083 558
1089 557
1095 557
1101 556
1107 554
1113 554
1119 554
1125 553
1131 552
1136 550
1142 550
1148 549
1153 549
1158 555
1162 561
1165 567
1167 573
1171 579
1173 585
1176 591
1178 596
1180 602
1180 608
1180 614
1181 620
1181 626
1182 632
1183 638
1183 644
1182 650
1181 656
1181 662
1181 668
1181 675
1181 681
1181 687
1179 692
1178 698
1177 704
1176 710
1174 716
1171 722
1168 728
1166 734
1163 740
1159 746
1153 752
1148 758
1144 763
1140 768
1136 774
1132 779
1129 785
1125 792
1121 797
1115 800
1109 805
1103 810
1097 816
1091 821
1086 826
1080 830
1075 833
1069 836
1064 840
1059 842
1053 844
1047 845
1041 848
1035 850
1029 852
1023 853
1017 854
1010 854
1004 854
998 854
992 852
986 851
980 850
974 848
968 846
962 844
956 842
950 841
944 839
938 836
932 833
926 831
920 828
914 825
908 822
902 820
897 817
891 815
886 812
881 809
875 807
870 804
864 801
858 798
852 795
847 790
841 787
835 785
830 781
824 777
818 773
812 769
808 765
803 760
798 754
793 748
789 742
784 737
780 732
778 726
777 720
774 715
771 709
768 703
766 697
764 691
761 685
758 679
756 673
754 667
752 661
750 655
748 649
748 643
745 637
745 631
742 625
741 618
741 612
738 608
740 603
739 597
738 591
738 585
738 579
740 573
738 567
IMAGE=D:\Peter Mayall\Images\Screen shot jpgs\1593.jpg
ID=0 
LM=3
1137.00000 555.00000
1133.00000 739.00000
841.00000 767.00000
OUTLINES=1
POINTS=200
762 561
767 560
772 561
778 562
784 565
789 565
795 565
801 565
807 563
812 563
818 562
824 562
829 562
835 562
841 562
846 562
852 563
858 564
863 564
868 562
872 562
876 564
882 563
888 563
894 563
899 563
905 563
911 563
916 563
922 559
928 559
933 559
939 559
945 559
950 559
955 561
961 559
966 559
972 559
978 559
984 559
989 559
995 559
1001 559
1006 559
1012 559
1018 557
1020 558
1025 558
1031 558
1036 558
1042 558
1048 558
1050 555
1056 555
1062 556
1068 556
1073 556
1079 556
1085 556
1090 556
1096 556
1102 556
1107 555
1113 553
1119 552
1124 553
1130 552
1136 553
1137 558
1139 563
1142 566
1143 572
1144 577
1146 583
1147 589
1149 594
1150 600
1153 606
1153 611
1154 617
1154 623
1154 628
1154 634
1153 640
1151 646
1152 651
1152 657
1152 663
1152 668
1151 674
1151 680
1151 685
1151 691
1151 697
1150 702
1148 708
1144 714
1142 719
1139 725
1136 730
1133 736
1134 740
1131 746
1128 751
1125 755
1123 761
1120 767
1118 772
1114 777
1109 782
1105 785
1100 790
1096 794
1092 799
1087 799
1084 803
1081 808
1076 811
1070 815
1064 819
1059 823
1054 826
1048 828
1043 829
1037 831
1031 832
1026 833
1020 834
1014 835
1009 835
1003 836
997 836
991 836
986 835
980 835
974 835
969 834
963 831
957 830
952 829
946 828
940 826
935 824
929 822
923 820
917 818
912 816
906 812
901 809
896 807
890 805
885 802
880 799
875 795
870 792
865 788
859 786
854 782
852 778
847 774
842 769
836 766
833 761
830 756
825 751
822 746
819 740
815 734
812 729
810 723
807 717
804 712
800 707
797 701
796 696
794 690
791 685
790 679
788 674
785 669
783 663
781 658
778 652
775 646
773 641
771 635
768 629
767 624
766 618
766 612
764 608
763 602
762 596
762 590
761 585
760 579
760 573
762 568
762 562
IMAGE=D:\Peter Mayall\Images\Screen shot jpgs\1594.jpg
ID=0
LM=3
1188.00000 485.00000
1160.00000 745.00000
842.00000 794.00000
OUTLINES=1
POINTS=200
710 486
716 485
724 483
731 483
737 480
745 480
752 480
759 480
766 480
774 480
781 479
788 478
796 478
803 478
809 479
812 480
819 481
826 481
834 481
841 481
848 481
855 481
863 482
870 482
877 483
882 481
888 478
893 482
901 482
908 480
915 482
923 482
930 482
937 482
944 482
952 482
959 483
966 483
974 484
981 484
988 484
996 485
1003 485
1010 486
1017 486
1025 486
1032 486
1039 486
1047 486
1054 486
1061 486
1069 486
1076 486
1083 485
1091 485
1098 485
1105 484
1112 483
1120 482
1127 482
1134 482
1142 482
1149 483
1156 484
1164 484
1171 485
1178 485
1186 484
1190 483
1196 488
1202 494
1204 501
1205 508
1205 515
1208 523
1209 530
1215 536
1220 544
1225 548
1229 555
1228 563
1228 570
1226 577
1223 584
1222 592
1221 599
1220 606
1219 614
1219 621
1217 628
1215 636
1213 643
1210 650
1206 658
1202 665
1199 672
1196 679
1193 687
1189 693
1187 700
1182 707
1179 714
1175 721
1169 729
1166 736
1163 743
1159 750
1156 758
1152 764
1146 770
1140 778
1133 784
1127 790
1121 798
1116 803
1109 810
1101 818
1094 824
1088 829
1081 833
1075 838
1068 840
1061 843
1053 846
1046 848
1039 850
1031 852
1024 853
1017 854
1009 854
1002 855
995 855
988 854
980 854
973 854
966 852
958 851
951 849
944 846
936 844
929 841
922 839
914 837
907 834
900 831
894 827
887 824
881 821
875 818
867 812
860 808
853 804
846 799
839 796
832 792
825 789
819 784
812 780
806 774
799 771
794 765
787 760
781 754
777 748
773 741
768 734
763 728
761 721
758 714
756 706
755 699
752 692
749 684
746 677
744 670
741 662
738 655
736 648
734 640
732 633
732 626
731 619
729 611
726 604
724 597
721 589
720 582
719 575
719 567
718 560
717 553
716 545
716 538
715 531
714 524
714 516
713 509
712 502
711 494
710 487
IMAGE=D:\Peter Mayall\Images\Screen shot jpgs\1596.jpg
ID=0
LM=3
1180.00000 382.00000
1219.00000 630.00000
845.00000 681.00000
OUTLINES=1
POINTS=200
705 379
712 378
720 378
727 379
734 379
742 380
749 380
756 380
763 380
771 380
778 378
785 379
793 380
800 380
807 380
815 380
822 380
829 379
837 379
844 379
851 380
858 379
866 380
873 380
880 379
888 379
895 379
902 378
910 378
917 378
924 378
932 378
939 378
946 378
953 377
961 377
968 377
975 377
983 377
990 375
997 375
1005 375
1012 375
1019 375
1026 375
1034 375
1041 375
1048 375
1056 376
1063 377
1070 377
1078 377
1085 377
1092 376
1100 376
1107 376
1114 377
1121 377
1129 377
1136 377
1143 377
1151 376
1158 376
1165 376
1173 375
1180 379
1187 384
1195 392
1199 399
1202 406
1202 413
1203 421
1206 428
1208 435
1209 443
1212 450
1214 457
1217 465
1219 472
1219 479
1221 487
1222 494
1223 501
1225 507
1226 515
1229 522
1230 529
1232 537
1232 544
1233 550
1234 558
1234 565
1234 572
1234 580
1234 587
1233 594
1233 601
1231 609
1231 616
1231 623
1226 631
1221 638
1217 645
1212 653
1207 660
1201 665
1196 669
1189 677
1184 684
1178 691
1171 698
1167 705
1161 712
1154 720
1148 726
1141 732
1133 738
1126 742
1119 745
1112 748
1104 751
1097 754
1090 756
1082 757
1075 757
1068 758
1060 758
1053 758
1046 758
1038 758
1031 757
1024 757
1017 757
1009 756
1002 755
995 754
987 753
980 752
973 750
966 747
959 743
952 740
944 736
937 734
930 731
923 731
915 726
908 722
901 717
893 713
886 706
879 700
871 696
864 693
857 689
849 685
843 680
836 677
829 672
821 666
814 661
807 657
799 650
795 643
789 636
783 628
779 621
774 614
769 607
763 599
756 592
751 585
746 577
742 570
737 563
732 555
729 548
724 541
719 533
715 526
712 519
709 512
706 504
703 497
700 490
698 482
697 475
697 468
697 460
697 453
697 446
697 438
697 431
697 424
697 417
698 409
699 402
700 395
700 387
704 380
IMAGE=D:\Peter Mayall\Images\Screen shot jpgs\1601.jpg
ID=0
LM=3
1171.00000 567.00000
1154.00000 761.00000
832.00000 786.00000
OUTLINES=1
POINTS=200
719 567
725 566
732 566
738 566
744 565
751 565
757 565
763 565
770 566
776 566
782 566
789 566
795 567
801 569
808 569
814 569
820 569
826 570
833 570
838 574
840 570
847 570
853 574
859 574
866 573
872 573
878 573
885 573
891 573
897 573
904 572
910 573
916 573
923 575
929 575
935 575
942 575
948 575
954 575
961 574
967 574
973 574
980 574
986 575
992 575
998 574
1005 574
1011 572
1017 573
1024 572
1030 572
1036 572
1043 572
1049 572
1055 572
1062 572
1068 572
1074 573
1081 574
1087 574
1093 574
1100 574
1106 572
1112 574
1119 572
1125 571
1127 569
1134 569
1140 569
1145 568
1150 567
1156 566
1162 565
1168 565
1172 564
1177 569
1182 575
1185 582
1187 588
1190 594
1192 601
1195 607
1197 613
1198 620
1199 626
1201 632
1201 639
1202 645
1202 651
1201 658
1200 664
1199 669
1198 676
1196 682
1195 688
1192 695
1190 701
1189 707
1188 714
1185 720
1182 726
1179 732
1174 739
1170 745
1166 750
1160 757
1157 761
1152 766
1147 772
1144 778
1139 783
1133 788
1128 793
1123 798
1118 803
1113 806
1108 811
1102 816
1097 820
1091 822
1085 827
1079 829
1073 832
1066 835
1060 837
1054 840
1047 843
1041 844
1035 845
1029 846
1022 846
1016 847
1010 848
1003 848
997 847
991 847
984 847
978 846
972 844
965 843
959 842
953 841
946 837
940 836
934 835
927 834
924 828
919 824
913 822
908 820
902 818
895 815
889 813
884 810
877 807
871 804
865 801
859 799
852 797
846 794
840 791
834 788
828 786
822 783
816 778
811 774
806 771
800 767
794 762
789 757
783 751
780 745
775 739
770 732
765 726
762 720
758 713
754 707
751 701
747 694
744 688
741 682
738 675
735 669
733 663
730 657
728 650
725 644
723 638
722 631
721 625
719 619
718 612
718 606
717 600
717 593
717 587
717 581
718 574
719 568
IMAGE=D:\Peter Mayall\Images\Screen shot jpgs\1614.jpg
ID=0
LM=3
1125.00000 535.00000
1064.00000 758.00000
821.00000 756.00000
OUTLINES=1
POINTS=200
778 490
784 489
789 491
795 495
801 498
806 499
811 503
815 507
820 508
826 512
831 514
837 516
843 518
848 520
854 522
860 524
865 525
871 527
877 528
882 528
888 529
894 529
899 530
905 531
910 532
916 532
922 532
927 532
933 532
939 533
944 533
950 534
956 534
961 535
967 535
973 536
978 537
984 537
989 537
995 537
1001 537
1006 537
1012 537
1018 537
1023 537
1029 538
1035 539
1040 540
1046 540
1052 540
1057 540
1063 540
1068 540
1074 542
1080 544
1085 544
1091 544
1097 542
1102 540
1108 538
1114 537
1118 534
1124 531
1130 535
1131 540
1131 546
1133 551
1138 557
1141 563
1144 568
1145 574
1147 580
1147 585
1147 591
1147 597
1147 602
1147 608
1144 614
1143 619
1140 625
1138 630
1134 636
1130 642
1129 647
1126 653
1124 659
1121 664
1119 670
1115 676
1112 681
1111 687
1106 693
1104 698
1100 704
1098 709
1095 715
1092 721
1090 726
1086 732
1083 738
1079 743
1073 748
1068 753
1065 758
1062 764
1061 770
1056 775
1051 778
1046 783
1043 789
1037 795
1033 800
1029 806
1024 812
1021 817
1016 823
1010 827
1005 831
999 835
993 838
988 841
982 843
977 845
971 845
965 845
960 845
954 845
948 845
943 845
937 845
931 842
926 840
920 837
914 835
909 832
903 831
898 828
892 825
886 821
881 818
875 814
869 810
864 807
858 802
853 796
849 791
843 786
839 780
835 775
829 770
825 765
819 761
814 755
809 751
803 745
799 739
795 734
791 728
788 722
787 717
784 711
783 705
783 700
780 694
779 689
779 683
778 677
778 672
778 666
778 660
778 655
778 649
778 643
778 638
776 632
775 626
775 621
775 615
775 610
775 604
774 598
774 593
773 587
772 581
772 576
772 570
772 564
772 559
772 553
772 547
774 542
775 536
775 531
776 525
776 519
776 514
776 508
775 502
775 497
777 491
IMAGE=D:\Peter Mayall\Images\Screen shot jpgs\1618.jpg
ID=0
LM=3
1146.00000 507.00000
1132.00000 713.00000
880.00000 730.00000
OUTLINES=1
POINTS=200
775 509
780 505
785 505
791 506
796 506
802 506
807 507
813 507
819 507
824 507
830 508
835 508
841 508
846 508
852 508
858 508
863 509
869 509
874 509
880 508
885 508
891 508
896 508
902 507
908 507
913 506
919 506
924 506
930 506
935 506
941 506
947 507
952 507
958 507
963 507
969 506
974 506
980 505
986 505
991 504
997 504
1002 503
1008 503
1013 503
1019 502
1025 502
1030 502
1036 502
1041 502
1047 502
1052 502
1058 502
1064 502
1069 502
1075 503
1080 503
1086 503
1091 503
1097 503
1103 503
1108 503
1114 504
1119 505
1125 505
1130 504
1136 504
1141 502
1147 506
1151 511
1155 516
1159 522
1162 527
1164 533
1166 538
1168 544
1168 550
1168 555
1168 561
1168 566
1168 572
1167 577
1164 583
1164 589
1164 594
1164 600
1164 605
1164 611
1163 616
1162 622
1161 628
1160 633
1160 639
1160 644
1160 650
1159 655
1159 661
1158 667
1156 672
1155 678
1154 683
1151 689
1148 694
1145 700
1143 705
1137 708
1132 713
1131 718
1128 724
1126 729
1123 735
1122 740
1118 746
1114 752
1112 757
1107 763
1103 768
1098 774
1094 778
1088 782
1082 786
1077 789
1071 791
1066 793
1060 795
1055 796
1049 797
1043 799
1038 801
1032 801
1027 802
1021 802
1016 802
1010 801
1004 799
999 800
993 799
988 796
982 798
977 796
972 793
967 792
961 789
955 786
950 784
944 782
940 778
934 773
929 769
923 765
917 761
912 757
907 751
902 749
896 744
892 739
886 735
880 733
875 731
869 729
864 726
858 723
853 720
847 715
841 709
836 705
832 699
829 694
826 688
824 683
822 677
821 671
819 666
818 660
818 655
815 649
815 644
814 638
812 632
811 627
809 621
807 616
805 610
804 605
803 599
801 594
799 588
797 582
797 577
795 571
792 566
790 560
788 555
786 549
784 543
781 538
780 532
778 527
777 521
776 516
775 510
IMAGE=D:\Peter Mayall\Images\Screen shot jpgs\1619.jpg
ID=0
LM=3
1150.00000 512.00000
1145.00000 660.00000
865.00000 754.00000
OUTLINES=1
POINTS=200
763 523
769 520
774 519
780 519
785 519
791 519
797 519
802 519
808 519
814 519
819 519
825 519
830 519
836 516
842 516
847 516
853 517
859 517
864 518
870 518
875 518
881 518
887 518
892 518
898 517
903 515
909 515
915 514
920 514
926 514
932 514
937 514
943 513
948 513
954 513
960 513
965 513
971 513
976 512
982 511
988 512
993 512
999 512
1005 512
1010 512
1016 511
1021 510
1027 510
1033 509
1038 509
1043 514
1049 514
1054 514
1060 514
1065 513
1071 513
1077 513
1082 513
1088 513
1093 513
1099 511
1105 511
1110 510
1116 509
1122 507
1127 507
1133 507
1138 507
1144 507
1150 507
1152 510
1155 515
1159 520
1161 525
1164 531
1164 536
1164 542
1164 548
1166 553
1168 559
1168 564
1168 570
1167 576
1166 581
1164 587
1163 593
1163 598
1162 604
1160 609
1160 615
1158 621
1158 626
1156 632
1154 637
1152 643
1147 649
1147 654
1145 660
1144 666
1143 671
1140 677
1137 682
1136 688
1133 694
1131 699
1127 705
1124 711
1120 716
1118 722
1116 727
1112 733
1106 739
1104 744
1100 750
1097 755
1091 761
1085 767
1080 770
1074 774
1068 777
1063 780
1057 783
1052 785
1046 787
1040 790
1035 791
1029 793
1024 795
1018 797
1012 798
1007 799
1001 799
995 800
990 800
984 801
979 801
973 801
967 801
962 801
956 800
950 799
945 797
939 796
934 795
928 793
922 791
917 790
911 788
906 786
900 782
894 779
889 776
883 773
877 769
872 765
866 762
861 759
855 755
849 750
844 745
838 740
832 734
827 730
821 725
816 720
811 714
807 708
804 703
800 697
797 692
794 686
790 680
787 675
784 669
783 663
780 658
776 652
774 647
771 641
769 635
767 630
766 624
765 619
763 613
762 607
761 602
760 596
760 590
760 585
760 579
761 574
761 568
761 562
761 557
760 551
759 545
759 540
759 534
759 529
762 523
IMAGE=D:\Peter Mayall\Images\Screen shot jpgs\1620.jpg
ID=0
LM=3
1221.00000 456.00000
1189.00000 814.00000
764.00000 797.00000
OUTLINES=1
POINTS=200
671 453
678 450
686 450
695 450
703 450
712 450
721 450
729 450
738 450
746 451
755 452
763 452
772 452
781 453
789 453
798 453
806 453
815 453
824 453
832 452
841 452
849 452
858 451
867 449
875 448
884 448
892 448
901 448
909 448
918 446
927 446
935 446
944 446
952 446
961 445
970 444
978 444
987 446
995 446
1004 446
1013 445
1021 445
1030 445
1038 444
1047 444
1055 443
1064 443
1073 443
1081 443
1090 443
1098 443
1107 444
1116 445
1124 445
1133 445
1141 445
1150 445
1159 446
1167 449
1176 449
1184 449
1193 449
1201 449
1210 449
1219 449
1226 453
1227 462
1233 468
1239 477
1246 485
1252 492
1258 501
1261 509
1264 518
1266 527
1269 535
1271 544
1272 552
1272 561
1273 569
1274 578
1275 587
1275 595
1274 604
1273 612
1272 621
1265 628
1263 636
1262 645
1262 653
1260 662
1258 671
1255 679
1254 688
1252 696
1251 705
1249 713
1246 722
1243 731
1239 739
1235 748
1230 756
1225 765
1219 774
1214 782
1208 791
1203 799
1196 808
1190 816
1182 824
1175 833
1168 840
1160 849
1152 856
1143 862
1135 869
1127 875
1118 882
1110 888
1101 894
1092 897
1084 900
1075 903
1067 908
1058 912
1050 915
1041 918
1032 919
1024 923
1015 923
1007 924
998 924
989 924
981 924
972 922
964 920
955 918
946 917
938 916
929 913
921 911
912 908
904 903
895 898
886 894
878 888
870 883
862 878
853 870
844 862
836 857
827 850
819 845
810 838
801 830
793 823
784 816
776 810
767 803
759 797
752 789
745 780
738 772
733 763
728 755
722 746
717 737
713 729
710 720
706 712
702 703
699 694
695 686
693 677
689 669
686 660
684 652
681 643
678 634
677 626
674 617
673 609
671 600
671 591
670 583
669 574
669 566
664 557
664 548
668 540
668 531
669 523
669 514
670 506
670 497
670 488
670 480
669 471
668 463
671 454
IMAGE=D:\Peter Mayall\Images\Screen shot jpgs\1621.jpg
ID=0
LM=3
1192.00000 472.00000
1173.00000 719.00000
803.00000 783.00000
OUTLINES=1
POINTS=200
685 464
690 459
697 458
705 459
713 460
720 461
728 461
736 461
743 461
751 461
759 461
766 461
774 461
782 461
789 462
797 462
805 462
812 462
820 462
828 462
835 462
843 462
851 462
858 462
866 462
874 461
882 461
889 461
897 462
905 462
912 462
920 462
928 462
935 461
943 462
951 462
958 462
966 462
974 461
981 461
989 461
997 460
1004 460
1012 460
1020 460
1027 460
1035 460
1043 462
1050 462
1058 461
1066 461
1073 461
1081 460
1089 459
1096 460
1104 460
1112 460
1119 460
1127 460
1135 461
1142 461
1150 462
1158 463
1165 464
1173 464
1181 465
1188 464
1195 469
1200 477
1204 484
1207 492
1207 500
1208 507
1209 515
1210 523
1212 531
1213 538
1215 546
1215 554
1215 561
1215 569
1215 577
1215 584
1215 592
1212 600
1209 607
1206 615
1202 623
1200 630
1199 638
1196 646
1195 653
1194 661
1192 669
1191 676
1190 684
1188 692
1186 699
1182 707
1178 715
1172 722
1168 730
1164 738
1158 745
1154 753
1148 760
1145 767
1142 775
1140 783
1138 790
1134 798
1129 806
1125 813
1120 821
1115 829
1108 836
1100 843
1092 850
1085 856
1077 862
1069 868
1062 873
1054 876
1046 878
1039 881
1031 883
1023 885
1015 887
1008 889
1000 891
992 891
985 891
977 891
969 891
962 889
954 887
946 885
939 882
931 879
923 876
916 873
908 869
900 864
893 860
885 856
877 850
870 846
862 840
854 833
847 828
839 820
833 813
826 807
818 802
810 794
803 789
795 783
788 776
781 771
773 768
766 761
760 754
754 746
748 738
743 731
737 723
730 718
725 711
721 703
719 695
716 688
713 680
711 672
710 665
710 657
709 649
707 641
705 634
704 626
702 618
701 611
701 603
701 595
697 588
697 580
696 572
695 565
695 557
694 549
694 542
692 534
690 526
690 519
689 511
687 503
687 496
685 488
684 480
683 473
684 465
IMAGE=D:\Peter Mayall\Images\Screen shot jpgs\1635.jpg
ID=0
LM=3
1196.00000 441.00000
1211.00000 767.00000
777.00000 766.00000
OUTLINES=1
POINTS=200
690 460
698 459
706 459
714 459
723 460
731 460
739 460
747 459
755 457
763 457
771 456
779 455
788 454
796 454
804 454
812 454
820 454
828 454
836 454
844 454
853 453
861 453
869 453
877 453
885 451
893 451
901 450
910 450
918 450
926 450
934 450
942 450
950 450
958 450
966 451
975 451
983 451
991 449
999 448
1007 447
1015 447
1023 447
1031 447
1040 447
1048 447
1056 447
1064 447
1072 447
1080 446
1088 447
1097 446
1105 446
1113 446
1121 445
1129 445
1137 445
1145 445
1153 445
1162 444
1170 443
1178 442
1186 440
1194 438
1202 439
1209 445
1214 453
1218 462
1220 470
1223 478
1226 486
1228 494
1229 502
1229 510
1231 519
1232 527
1234 535
1236 543
1239 551
1240 558
1242 566
1243 574
1246 583
1247 591
1247 599
1247 607
1247 615
1247 623
1247 631
1247 639
1246 648
1243 656
1240 664
1238 672
1237 680
1235 688
1234 696
1231 705
1230 713
1229 721
1224 729
1224 737
1223 745
1220 753
1218 761
1215 770
1210 778
1205 786
1197 794
1189 800
1182 807
1176 815
1168 823
1161 830
1154 838
1146 846
1138 852
1132 859
1125 865
1117 870
1108 876
1100 881
1092 887
1084 891
1076 895
1068 897
1060 900
1052 900
1043 900
1035 900
1027 900
1019 900
1011 900
1003 900
995 900
986 898
978 897
970 897
962 894
954 891
946 889
938 886
930 883
921 880
913 877
905 872
897 867
889 863
881 859
873 855
865 850
856 842
848 836
840 829
832 821
824 814
816 808
810 800
801 792
793 786
785 780
778 773
771 766
764 760
758 752
750 745
744 736
738 728
732 720
729 712
726 704
722 696
720 688
718 680
716 671
714 663
713 655
711 647
710 639
707 631
705 623
705 614
704 606
702 598
701 590
699 582
699 574
699 566
698 558
697 549
693 542
692 534
693 526
693 518
693 510
693 502
695 494
693 485
691 477
693 469
690 461
IMAGE=D:\Peter Mayall\Images\Screen shot jpgs\1638.jpg
ID=0
LM=3
1157.00000 545.00000
1161.00000 762.00000
862.00000 770.00000
OUTLINES=1
POINTS=200
752 555
758 554
764 554
770 554
776 554
782 554
787 554
793 554
799 554
805 554
811 554
817 555
823 556
829 557
835 557
841 557
846 557
852 557
858 557
864 556
870 556
876 555
882 555
888 555
894 555
900 553
906 553
911 553
917 553
923 553
929 552
935 551
941 551
947 551
953 551
959 550
965 549
970 549
976 549
982 549
988 549
994 549
1000 549
1006 549
1012 549
1018 548
1024 548
1030 548
1035 548
1041 547
1047 547
1053 547
1059 546
1065 546
1071 546
1077 545
1083 544
1089 544
1094 544
1100 543
1106 543
1112 541
1118 541
1124 541
1129 539
1134 541
1140 541
1146 541
1152 540
1157 543
1163 545
1168 551
1173 557
1175 563
1177 569
1179 575
1181 581
1184 587
1187 593
1191 598
1195 604
1198 610
1199 616
1202 622
1203 628
1204 634
1206 640
1207 646
1208 652
1209 658
1210 663
1210 669
1210 675
1210 681
1209 687
1207 693
1205 699
1203 705
1200 711
1197 717
1193 722
1190 728
1188 734
1185 740
1180 746
1175 751
1169 754
1163 760
1159 766
1155 772
1151 777
1145 782
1139 788
1133 792
1127 797
1121 799
1116 803
1110 807
1104 811
1098 814
1092 818
1087 820
1081 824
1075 826
1069 828
1063 830
1057 832
1051 833
1045 833
1039 833
1033 834
1028 834
1022 834
1016 834
1010 833
1004 832
998 831
992 830
986 830
980 827
974 825
968 823
963 822
957 820
951 817
945 816
939 813
933 811
927 809
921 806
915 804
909 801
904 798
898 794
892 791
886 788
880 784
874 781
868 777
862 773
856 769
850 767
844 762
840 757
834 754
828 750
822 746
816 743
811 737
805 731
799 726
794 720
788 714
784 709
779 703
774 698
768 692
765 686
760 680
756 674
752 668
749 662
748 656
746 650
744 645
743 639
743 633
743 627
743 621
743 615
743 609
745 603
746 597
748 591
748 586
748 580
748 574
750 568
752 562
751 556
IMAGE=D:\Peter Mayall\Images\Screen shot jpgs\1645.jpg
ID=0
LM=3
1129.00000 500.00000
1140.00000 695.00000
869.00000 747.00000
OUTLINES=1
POINTS=200
752 515
758 515
763 515
769 515
775 514
780 514
786 513
792 514
798 514
803 513
809 513
815 512
820 512
826 512
832 512
837 511
843 510
849 510
854 511
860 511
866 511
871 511
877 510
883 509
889 509
894 511
900 511
906 509
911 509
917 509
923 509
928 507
934 505
940 503
945 505
951 505
957 504
962 504
968 504
974 504
980 504
985 504
991 504
997 504
1002 503
1008 503
1014 503
1019 502
1025 502
1031 501
1036 501
1042 499
1048 499
1053 499
1059 499
1065 498
1071 497
1076 497
1082 496
1088 496
1093 496
1099 496
1105 496
1110 496
1116 496
1122 495
1127 495
1133 499
1137 505
1139 511
1140 516
1141 522
1144 528
1144 533
1145 539
1147 545
1150 550
1151 556
1151 562
1151 567
1153 573
1155 579
1155 584
1157 590
1158 596
1159 602
1159 607
1159 613
1159 619
1159 624
1158 630
1158 636
1157 641
1156 647
1154 653
1153 658
1153 664
1152 670
1151 675
1149 681
1146 687
1144 693
1141 698
1139 704
1137 710
1134 715
1130 721
1126 727
1124 732
1120 738
1117 744
1114 749
1109 755
1103 761
1098 766
1092 769
1086 774
1080 777
1075 781
1069 784
1063 788
1058 791
1052 792
1046 795
1041 797
1035 798
1029 800
1024 802
1018 803
1012 803
1007 803
1001 803
995 803
989 804
984 804
978 804
972 803
967 802
961 802
955 801
950 799
944 798
938 797
933 796
927 793
921 790
915 787
910 783
904 779
898 775
894 771
888 766
882 760
877 757
871 752
865 750
860 748
854 745
848 741
843 738
837 734
831 729
825 724
820 720
816 714
810 709
805 704
801 698
797 692
794 687
790 681
787 675
784 670
780 664
776 658
773 653
771 647
769 641
767 635
765 630
762 624
758 618
755 613
753 607
751 601
751 596
750 590
748 584
747 579
746 573
746 567
746 562
746 556
746 550
746 544
747 539
748 533
749 527
750 522
751 516
IMAGE=D:\Peter Mayall\Images\Screen shot jpgs\1654.jpg
ID=0
LM=3
1165.00000 528.00000
1154.00000 722.00000
885.00000 756.00000
OUTLINES=1
POINTS=200
769 538
774 535
779 535
785 534
790 537
796 537
801 537
807 537
812 536
818 535
823 535
829 535
835 535
840 535
846 535
851 535
857 535
862 535
868 535
873 535
879 535
885 535
890 535
896 535
901 535
907 535
912 535
918 535
923 534
929 533
934 533
940 533
946 532
951 531
957 531
962 531
968 531
973 531
979 531
984 531
990 530
995 530
1001 529
1007 529
1012 530
1018 531
1023 531
1029 531
1034 531
1040 531
1045 529
1051 527
1056 526
1062 528
1068 528
1073 528
1079 528
1084 527
1090 526
1095 526
1101 527
1106 527
1112 527
1118 526
1123 526
1129 526
1134 526
1140 526
1145 527
1150 526
1154 525
1160 523
1163 526
1167 532
1170 538
1171 543
1175 549
1175 554
1176 560
1176 565
1176 571
1177 576
1179 582
1181 587
1183 593
1185 599
1185 604
1186 610
1187 615
1188 621
1189 626
1191 632
1191 637
1191 643
1190 648
1189 654
1189 660
1188 665
1186 671
1184 676
1182 682
1180 687
1178 693
1176 698
1172 704
1168 710
1164 715
1159 721
1154 723
1148 727
1144 732
1141 738
1136 743
1133 749
1128 754
1124 760
1119 766
1114 771
1108 777
1103 780
1097 784
1092 786
1086 790
1081 792
1075 794
1070 797
1064 800
1058 802
1053 803
1047 806
1042 807
1036 808
1031 809
1025 809
1020 809
1014 809
1009 809
1003 809
997 809
992 809
986 809
981 809
975 809
970 808
964 807
959 805
953 802
947 799
942 797
936 794
931 792
925 790
920 788
914 784
909 780
903 776
898 772
894 766
888 761
883 757
877 752
872 748
866 742
861 738
855 732
850 727
844 722
841 717
836 711
832 705
829 700
826 694
823 689
820 683
817 678
814 672
811 667
807 661
805 656
802 650
800 644
798 639
797 633
795 628
793 622
791 617
789 611
787 606
784 600
783 594
781 589
780 583
778 578
776 572
775 567
774 561
773 556
771 550
770 545
769 539
IMAGE=D:\Peter Mayall\Images\Screen shot jpgs\1711.jpg
ID=0
LM=3
1140.00000 523.00000
1125.00000 730.00000
875.00000 753.00000
OUTLINES=1
POINTS=200
775 534
779 532
785 533
790 533
795 533
801 533
806 532
811 532
817 532
822 532
828 533
833 534
838 534
844 534
849 533
854 532
860 532
865 531
870 531
876 531
881 530
886 530
892 530
897 530
902 530
908 530
913 530
918 530
924 530
929 530
935 530
940 530
945 530
951 530
956 530
961 530
967 530
972 529
977 529
983 528
988 528
993 528
999 528
1004 528
1009 528
1015 527
1020 526
1026 525
1031 523
1036 523
1042 523
1047 523
1052 523
1058 523
1063 523
1068 523
1074 523
1079 523
1084 521
1090 518
1095 517
1100 517
1106 517
1111 517
1117 517
1122 517
1127 517
1133 517
1138 517
1143 520
1148 526
1151 531
1153 536
1156 542
1156 547
1157 552
1159 558
1160 563
1162 568
1165 574
1166 579
1166 584
1168 590
1169 595
1170 601
1170 606
1170 611
1170 617
1170 622
1171 627
1172 633
1172 638
1172 643
1171 649
1170 654
1169 659
1167 665
1166 670
1163 675
1161 681
1158 686
1155 692
1152 697
1149 702
1146 708
1143 713
1140 718
1135 724
1130 729
1126 734
1121 740
1117 745
1112 750
1107 756
1102 761
1097 764
1091 766
1086 770
1080 776
1075 779
1070 783
1064 786
1059 788
1054 790
1048 792
1043 793
1038 796
1032 799
1027 800
1022 800
1016 801
1011 801
1006 801
1000 801
995 801
990 801
984 800
979 799
973 798
968 798
963 798
957 797
952 795
947 793
941 790
936 789
931 787
925 782
920 781
915 779
909 776
904 773
899 770
893 767
888 764
883 759
878 755
873 751
867 749
862 745
857 742
851 738
847 733
842 728
836 722
832 717
829 712
823 706
819 701
815 696
812 690
808 685
806 679
804 674
801 669
798 663
794 658
791 653
788 647
785 642
782 637
781 631
779 626
778 621
776 615
775 610
774 605
772 599
771 594
771 589
771 583
770 578
770 572
770 567
770 562
771 556
772 551
772 546
774 540
775 535
IMAGE=D:\Peter Mayall\Images\Screen shot jpgs\1871.jpg
ID=0
LM=3
1146.00000 546.00000
1091.00000 749.00000
852.00000 758.00000
OUTLINES=1
POINTS=200
794 546
799 545
805 545
810 545
815 549
821 549
826 549
831 549
837 549
842 548
848 548
853 547
858 547
864 546
869 545
874 548
880 548
885 548
890 548
896 548
901 548
906 548
912 547
917 546
922 546
928 546
933 546
938 546
944 546
949 546
955 546
960 546
965 546
971 546
976 546
981 546
987 546
992 546
997 546
1003 545
1008 544
1013 544
1019 544
1024 544
1029 544
1035 544
1040 544
1046 544
1051 544
1056 544
1062 544
1067 543
1072 543
1078 543
1082 544
1087 547
1093 546
1097 545
1102 545
1108 545
1113 545
1118 545
1124 545
1129 545
1135 544
1140 544
1144 546
1146 551
1146 556
1148 561
1149 567
1149 572
1149 577
1149 583
1149 588
1149 593
1149 599
1149 604
1147 609
1145 615
1142 620
1140 625
1138 631
1136 636
1134 642
1132 647
1130 652
1129 658
1127 663
1124 668
1122 674
1119 679
1118 684
1116 690
1114 695
1111 700
1108 706
1107 711
1105 716
1103 722
1101 727
1099 733
1097 738
1095 743
1094 749
1090 754
1088 759
1088 765
1086 770
1085 775
1082 781
1080 786
1078 791
1076 797
1073 802
1070 807
1065 813
1061 818
1056 824
1052 828
1047 832
1041 836
1036 840
1031 843
1025 847
1020 849
1015 851
1009 851
1004 852
999 852
993 852
988 852
983 852
977 852
972 852
967 852
961 851
956 849
950 848
945 846
940 844
934 842
929 839
924 836
918 834
913 831
908 828
902 822
897 819
892 814
886 808
882 803
878 798
875 792
872 787
867 781
863 776
859 771
854 765
849 761
845 756
841 750
838 745
837 740
835 734
833 729
831 724
831 718
831 713
830 708
829 702
828 697
826 691
825 686
824 681
824 675
824 670
824 665
823 659
822 654
819 649
818 643
816 638
815 633
814 627
813 622
811 617
810 611
809 606
808 601
807 595
805 590
804 584
803 579
801 574
800 568
798 563
797 558
796 552
794 547
IMAGE=D:\Peter Mayall\Images\Screen shot jpgs\1880.jpg
ID=0
LM=3
1129.00000 515.00000
1129.00000 696.00000
862.00000 740.00000
OUTLINES=1
POINTS=200
747 528
752 525
758 525
763 526
769 526
774 526
779 526
785 526
790 526
795 526
801 526
806 526
812 526
817 526
822 526
828 526
833 526
839 526
844 526
849 526
855 526
860 526
866 526
871 526
876 526
882 526
887 525
892 525
898 524
903 524
909 524
914 524
919 524
925 524
930 523
936 523
941 522
946 522
952 521
957 520
962 519
968 519
973 519
979 519
984 519
989 519
995 519
1000 518
1006 518
1011 517
1016 515
1022 515
1027 515
1033 515
1038 514
1043 513
1049 513
1054 512
1059 512
1065 511
1070 511
1076 511
1081 511
1086 511
1092 511
1097 511
1103 511
1108 511
1113 511
1119 510
1124 510
1129 507
1135 511
1138 516
1143 522
1146 527
1148 532
1151 538
1153 543
1155 549
1156 554
1156 559
1156 565
1156 570
1156 576
1157 581
1157 586
1157 592
1158 597
1158 602
1158 608
1158 613
1158 619
1157 624
1155 629
1154 635
1153 640
1151 646
1151 651
1150 656
1149 662
1148 667
1145 672
1143 678
1142 683
1139 689
1136 694
1133 699
1128 705
1123 710
1119 716
1115 721
1110 726
1104 731
1100 736
1096 741
1090 746
1085 751
1079 754
1074 756
1069 759
1063 763
1058 765
1052 767
1047 770
1042 773
1036 776
1031 778
1025 779
1020 781
1015 783
1009 784
1004 785
999 785
993 785
988 785
982 785
977 785
972 785
966 785
961 785
955 784
950 783
945 782
939 781
934 779
929 777
923 776
918 776
912 774
907 771
902 769
896 766
891 764
885 761
880 757
875 753
869 750
864 746
858 741
854 736
849 733
843 728
840 723
835 718
830 712
826 707
820 701
817 696
812 691
809 685
807 680
804 674
801 669
799 664
795 658
793 653
790 648
787 642
785 637
781 631
777 626
776 621
772 615
769 610
766 604
764 599
762 594
760 588
758 583
756 577
755 572
754 567
753 561
752 556
750 551
750 545
749 540
747 534
747 529
IMAGE=D:\Peter Mayall\Images\Screen shot jpgs\1964.jpg
ID=0
LM=3
1149.00000 517.00000
1104.00000 730.00000
855.00000 742.00000
OUTLINES=1
POINTS=200
741 515
746 512
752 511
757 511
763 511
769 511
775 511
779 509
785 510
790 509
796 509
801 510
807 510
813 510
819 510
825 510
830 510
836 510
842 510
848 511
853 511
859 511
865 511
871 511
876 511
882 511
888 511
894 511
900 511
905 511
911 511
917 511
923 511
928 511
934 511
940 511
946 511
951 512
957 512
963 512
969 512
973 516
978 518
984 516
990 516
996 516
1001 516
1007 515
1013 515
1019 515
1024 514
1030 514
1036 513
1042 513
1048 513
1053 513
1059 513
1065 514
1071 514
1076 514
1082 514
1088 514
1094 512
1099 512
1105 510
1111 510
1117 510
1123 510
1128 510
1134 511
1140 512
1146 512
1148 512
1154 515
1155 521
1157 527
1158 532
1158 538
1158 544
1158 550
1158 556
1158 561
1158 567
1158 573
1159 579
1159 584
1159 590
1159 596
1159 602
1158 607
1156 613
1153 619
1152 625
1150 631
1149 636
1147 642
1144 648
1142 654
1141 659
1139 665
1137 671
1135 677
1133 682
1130 688
1128 694
1126 700
1124 705
1121 711
1118 717
1113 723
1107 725
1106 730
1102 736
1100 742
1097 748
1093 753
1089 759
1085 765
1080 771
1077 776
1071 782
1067 788
1061 793
1055 797
1050 800
1044 804
1038 808
1032 811
1027 812
1021 813
1015 814
1009 816
1004 816
998 817
992 817
986 817
980 817
975 817
969 817
963 815
957 812
952 810
946 809
940 806
934 803
929 801
923 798
917 793
911 790
905 785
900 781
894 777
888 773
882 768
877 764
871 760
865 755
859 751
854 747
848 743
843 739
838 733
832 727
828 722
823 716
817 711
814 705
810 700
806 694
801 688
797 682
794 677
791 671
788 665
786 659
784 653
782 648
780 642
777 636
776 630
774 625
773 619
770 613
767 607
766 602
763 596
762 590
759 584
757 578
755 573
753 567
751 561
750 555
748 550
745 544
745 538
743 532
743 527
745 521
741 516
IMAGE=D:\Peter Mayall\Images\Screen shot jpgs\2020.jpg
ID=0
LM=3
1108.00000 484.00000
1117.00000 647.00000
882.00000 691.00000
OUTLINES=1
POINTS=200
777 486
781 485
786 485
791 485
795 485
800 485
805 485
810 484
815 484
820 484
824 484
829 484
834 485
839 485
844 485
849 485
853 485
858 485
863 486
868 486
873 486
878 487
882 487
887 487
892 487
897 486
902 486
907 486
911 486
916 486
921 486
926 485
931 485
936 485
941 486
945 487
950 487
955 486
960 485
965 485
970 485
974 485
979 484
984 483
989 482
994 485
999 485
1003 485
1008 484
1013 483
1018 482
1023 481
1028 481
1032 481
1037 480
1042 480
1047 480
1052 480
1057 479
1062 479
1066 479
1071 479
1076 479
1081 478
1086 477
1091 476
1095 476
1100 476
1105 477
1110 481
1114 486
1116 491
1119 495
1122 500
1125 505
1127 510
1129 515
1130 520
1131 524
1131 529
1133 534
1134 539
1135 544
1136 549
1137 553
1137 558
1137 563
1137 568
1137 573
1137 578
1136 583
1135 587
1134 592
1132 597
1132 602
1131 607
1130 612
1130 616
1128 621
1127 626
1126 631
1125 636
1123 641
1122 645
1120 650
1117 655
1116 660
1113 665
1112 670
1109 674
1104 679
1099 684
1094 689
1089 693
1084 697
1080 701
1076 705
1071 706
1066 708
1061 711
1056 713
1051 718
1047 721
1042 724
1037 726
1032 728
1027 729
1022 731
1018 732
1013 733
1008 734
1003 734
998 735
993 735
989 735
984 735
979 735
974 735
969 735
964 734
960 733
955 731
950 729
945 729
940 727
935 725
930 724
926 722
921 718
916 714
911 711
906 708
901 705
897 702
892 698
887 696
882 691
877 687
872 683
869 679
864 674
859 670
854 665
849 660
844 656
841 652
837 647
835 642
831 637
828 632
825 627
820 622
816 618
813 613
811 608
808 603
806 598
804 593
802 589
799 584
796 579
793 574
791 569
789 564
788 560
786 555
784 550
782 545
781 540
780 535
780 531
779 526
779 521
777 516
776 511
776 506
776 502
776 497
777 492
777 487
IMAGE=D:\Peter Mayall\Images\Screen shot jpgs\2379.jpg
ID=0
LM=3
1108.00000 517.00000
1140.00000 693.00000
901.00000 710.00000
OUTLINES=1
POINTS=200
797 516
802 513
806 514
811 514
816 514
821 514
825 515
830 519
835 520
839 520
844 519
849 519
854 519
858 519
863 520
868 520
872 520
877 520
882 520
887 520
891 520
896 520
901 520
906 519
910 519
915 519
920 519
924 518
929 518
934 518
939 518
943 518
948 518
953 518
957 518
962 518
967 518
972 519
976 519
981 519
986 519
990 519
995 520
1000 520
1005 520
1009 520
1014 520
1019 520
1023 520
1028 520
1033 520
1038 520
1042 519
1047 518
1052 518
1057 517
1061 516
1066 515
1071 514
1075 513
1080 512
1085 511
1090 511
1094 511
1099 511
1104 511
1108 511
1112 516
1114 521
1117 526
1118 530
1119 535
1121 540
1123 544
1127 549
1129 554
1131 559
1132 563
1134 568
1136 573
1138 577
1140 582
1142 587
1145 592
1147 596
1150 601
1152 606
1154 611
1155 615
1156 620
1156 625
1156 629
1156 634
1156 639
1156 644
1156 648
1156 653
1155 658
1155 662
1154 667
1153 672
1151 677
1148 681
1145 686
1141 691
1138 695
1135 700
1130 705
1125 710
1122 714
1118 719
1114 724
1110 727
1105 732
1100 737
1095 742
1091 746
1086 750
1081 753
1076 755
1072 757
1067 759
1062 761
1058 763
1053 765
1048 767
1043 768
1039 769
1034 771
1029 771
1025 771
1020 771
1015 771
1010 772
1006 772
1001 772
996 770
992 768
987 766
982 764
977 763
973 760
968 757
963 754
959 754
954 751
949 748
944 746
940 743
935 739
930 735
925 732
921 729
916 726
911 722
907 719
902 714
897 711
892 707
889 703
885 698
882 693
879 689
875 685
871 680
867 675
863 672
859 667
855 662
852 659
848 654
845 649
842 644
838 640
835 635
831 630
829 626
825 621
821 616
817 611
815 607
812 602
808 597
804 592
803 588
801 583
799 578
798 574
798 569
797 564
797 559
796 555
796 550
796 545
796 541
797 536
798 531
798 526
798 522
797 517
IMAGE=D:\Peter Mayall\Images\Screen shot jpgs\2383.jpg
ID=0
LM=3
1085.00000 539.00000
1089.00000 684.00000
829.00000 722.00000
OUTLINES=1
POINTS=200
755 520
759 518
764 518
769 519
774 521
779 521
784 522
789 522
793 523
798 523
803 523
808 524
813 524
818 524
823 525
828 525
833 525
838 525
843 525
848 526
853 527
858 527
863 527
867 527
872 527
877 527
882 527
887 527
892 527
897 527
902 527
907 527
912 527
917 527
922 527
927 527
932 527
937 527
942 527
946 527
951 527
956 529
961 531
966 531
971 531
976 530
981 529
986 529
991 530
996 530
1001 530
1006 530
1011 530
1016 530
1020 530
1025 530
1030 530
1035 530
1040 531
1045 532
1050 532
1055 532
1060 532
1065 532
1070 532
1075 532
1080 532
1085 531
1090 536
1092 540
1092 545
1093 550
1096 555
1098 560
1098 565
1098 570
1098 575
1099 580
1099 585
1100 590
1101 595
1101 600
1102 605
1102 610
1102 615
1102 619
1102 624
1101 629
1100 634
1098 639
1097 644
1097 649
1097 654
1097 659
1097 664
1097 669
1096 674
1095 679
1094 684
1092 689
1090 693
1086 698
1085 703
1083 708
1081 713
1078 718
1075 723
1071 728
1066 733
1063 738
1059 743
1054 748
1050 752
1045 756
1040 760
1036 762
1031 765
1026 767
1021 769
1016 772
1011 774
1006 776
1001 779
996 780
991 781
986 783
981 785
976 786
971 786
966 786
961 786
957 786
952 786
947 787
942 787
937 787
932 786
927 785
922 785
917 783
912 781
907 778
902 776
897 773
892 769
887 766
883 764
878 759
873 756
868 752
863 747
858 744
853 740
848 737
843 732
839 728
834 724
829 720
824 717
819 714
814 711
810 708
806 704
801 699
796 694
791 689
787 684
784 679
781 674
778 669
776 664
774 659
772 654
770 649
768 644
766 639
765 634
762 630
760 625
759 620
757 615
756 610
756 605
755 600
754 595
754 590
753 585
752 580
751 575
750 570
748 565
748 560
748 556
748 551
748 546
748 541
748 536
750 531
752 526
754 521
IMAGE=D:\Peter Mayall\Images\Screen shot jpgs\2402.jpg
ID=0
LM=3
1118.00000 552.00000
1120.00000 723.00000
878.00000 778.00000
OUTLINES=1
POINTS=200
786 561
790 558
795 559
800 559
805 559
811 559
816 560
821 561
826 561
831 561
836 561
841 561
846 561
852 561
857 561
862 562
867 562
872 562
877 562
882 562
887 562
893 561
898 561
903 560
908 560
913 560
918 559
923 559
928 558
933 558
939 558
944 558
949 558
954 558
959 558
964 558
969 558
974 558
980 559
985 559
990 559
995 559
1000 559
1005 558
1010 558
1015 557
1021 557
1026 556
1031 556
1036 555
1041 555
1046 554
1051 554
1056 553
1062 552
1067 553
1072 553
1077 552
1082 552
1087 551
1092 550
1097 550
1102 549
1108 549
1113 549
1118 549
1123 553
1126 558
1129 563
1133 568
1135 573
1137 579
1139 584
1140 589
1141 594
1143 599
1144 604
1144 609
1144 614
1144 620
1144 625
1144 630
1144 635
1143 640
1142 645
1140 650
1139 655
1137 660
1136 666
1134 671
1133 676
1132 681
1132 686
1131 691
1131 696
1131 701
1131 707
1129 712
1128 717
1127 722
1125 727
1124 732
1121 737
1119 742
1115 748
1113 753
1110 758
1107 763
1105 768
1101 773
1098 778
1095 783
1091 789
1086 793
1081 797
1077 802
1073 806
1068 811
1063 814
1058 817
1053 822
1047 822
1042 823
1037 824
1032 825
1027 827
1022 828
1017 828
1012 830
1006 830
1001 831
996 832
991 832
986 832
981 832
976 830
971 830
965 828
960 826
955 825
950 822
945 821
940 819
935 817
930 815
925 813
919 810
914 807
909 804
904 801
899 797
894 794
889 792
884 790
878 784
873 781
868 777
863 774
858 771
853 767
850 762
845 757
842 751
838 746
834 741
831 736
828 731
825 726
822 721
819 716
816 710
813 705
812 700
811 695
810 690
809 685
808 680
807 675
807 670
807 664
807 659
807 654
808 649
808 644
808 639
807 634
805 629
803 623
801 618
799 613
795 608
793 603
792 598
790 593
789 588
788 582
787 577
786 572
786 567
786 562
IMAGE=D:\Peter Mayall\Images\Screen shot jpgs\5111.jpg
ID=0
LM=3
1117.00000 586.00000
1076.00000 754.00000
846.00000 787.00000
OUTLINES=1
POINTS=200
760 591
765 588
770 587
775 587
779 589
784 589
788 589
793 588
798 589
803 589
808 590
813 591
818 591
823 592
828 592
833 593
837 593
842 593
847 593
852 593
857 593
862 593
867 595
872 595
877 595
882 595
887 595
891 595
896 595
901 595
906 595
911 594
916 594
921 594
926 594
931 593
936 594
940 594
945 595
950 595
955 595
960 595
965 594
970 594
975 594
980 593
985 593
990 593
994 593
999 593
1004 592
1009 592
1014 592
1019 592
1024 592
1029 592
1034 592
1039 592
1043 592
1048 592
1053 592
1058 592
1063 592
1068 592
1073 591
1078 591
1083 591
1088 590
1093 590
1097 590
1102 590
1107 589
1112 588
1117 586
1121 587
1122 592
1124 597
1126 602
1127 607
1127 611
1128 616
1128 621
1128 626
1128 631
1128 636
1128 641
1127 646
1125 651
1124 656
1123 661
1121 665
1120 670
1118 675
1118 680
1116 685
1115 690
1113 695
1110 700
1108 705
1106 710
1104 714
1102 719
1100 724
1099 729
1096 734
1094 739
1090 744
1086 749
1083 754
1078 758
1074 762
1069 766
1065 771
1060 775
1055 779
1050 783
1046 788
1041 793
1036 797
1031 801
1027 806
1023 810
1018 814
1013 816
1008 818
1003 819
998 820
993 821
988 822
983 824
978 825
974 826
969 826
964 827
959 827
954 827
949 828
944 828
939 828
934 827
929 827
924 825
920 823
915 822
910 821
905 819
900 817
895 816
890 814
885 812
880 809
875 807
871 806
866 804
861 801
856 798
851 794
846 791
841 789
836 784
831 779
826 776
821 772
817 768
815 763
811 758
807 753
805 748
801 743
798 738
793 734
789 729
786 724
783 720
781 715
779 710
777 705
775 700
772 695
770 690
768 685
766 680
765 675
762 670
761 666
758 661
757 656
756 651
756 646
755 641
755 636
755 631
755 626
755 621
754 617
754 612
754 607
755 602
757 597
759 592
IMAGE=D:\Peter Mayall\Images\Screen shot jpgs\5258.jpg
ID=0
LM=3
1126.00000 577.00000
1095.00000 791.00000
858.00000 808.00000
OUTLINES=1
POINTS=200
766 576
770 574
776 575
781 575
787 576
792 578
798 578
803 578
809 577
814 577
820 578
825 578
831 578
836 578
842 578
847 578
852 578
858 578
863 578
869 578
874 578
880 578
885 578
891 578
896 579
902 579
907 579
913 578
918 577
924 577
929 577
934 577
940 576
945 575
951 575
956 575
962 574
967 573
973 573
978 573
983 574
988 576
994 575
999 574
1005 574
1010 575
1015 575
1021 575
1026 575
1032 574
1037 574
1043 573
1048 572
1054 572
1059 572
1065 572
1070 572
1076 572
1081 572
1087 573
1092 574
1093 571
1098 571
1103 571
1109 571
1114 571
1120 572
1125 573
1131 576
1136 580
1142 585
1145 590
1147 596
1149 601
1150 607
1150 612
1150 618
1152 623
1152 628
1152 634
1153 639
1153 645
1153 650
1153 656
1153 661
1152 667
1151 672
1151 678
1151 683
1149 689
1149 694
1147 700
1147 705
1146 710
1144 716
1143 721
1142 727
1141 732
1139 738
1137 743
1135 749
1132 754
1129 760
1126 765
1121 771
1117 776
1112 782
1107 785
1103 790
1098 796
1094 801
1088 805
1084 810
1078 815
1073 818
1067 822
1062 826
1056 831
1051 834
1045 837
1040 841
1034 844
1029 848
1024 850
1018 853
1013 854
1007 855
1002 856
996 857
991 858
985 858
980 858
974 858
969 858
963 859
958 859
952 859
947 858
942 857
936 856
931 853
925 850
920 848
914 844
909 841
903 838
898 838
892 835
887 832
881 828
876 826
870 822
865 818
859 815
855 810
850 807
844 803
840 798
835 793
830 789
824 785
819 782
814 776
809 772
803 767
798 762
792 756
791 751
789 745
788 740
786 735
784 729
783 724
782 718
781 713
779 707
778 702
776 696
775 691
774 685
774 680
774 674
773 669
771 663
770 658
770 653
769 647
768 642
768 636
768 631
768 625
768 620
768 614
768 609
768 603
768 598
767 593
766 588
766 582
766 577
IMAGE=D:\Peter Mayall\Images\Screen shot jpgs\11893.jpg
ID=0
LM=3
1105.00000 529.00000
1093.00000 656.00000
846.00000 747.00000
OUTLINES=1
POINTS=200
779 526
784 524
789 524
794 525
799 525
804 525
809 525
814 526
819 526
824 525
829 524
834 523
839 523
844 524
849 524
855 524
860 524
865 525
870 526
875 527
880 528
885 529
890 529
895 529
900 529
905 529
910 529
915 529
920 529
925 528
930 528
935 528
940 527
945 528
950 529
955 528
960 528
965 527
970 527
975 526
980 526
985 526
990 526
996 526
1001 526
1006 526
1011 526
1016 526
1021 526
1026 526
1031 526
1036 526
1041 527
1046 527
1051 527
1056 527
1061 526
1066 526
1071 526
1076 526
1081 526
1086 526
1091 526
1096 526
1101 526
1106 528
1106 533
1106 538
1106 543
1105 548
1106 553
1109 558
1111 564
1112 569
1111 573
1112 578
1112 583
1112 588
1112 593
1110 598
1109 603
1107 608
1105 613
1103 618
1102 623
1102 628
1100 633
1098 638
1096 643
1095 648
1094 653
1092 658
1092 663
1092 668
1092 673
1089 678
1086 683
1086 688
1084 693
1083 698
1080 704
1078 709
1076 714
1073 719
1070 724
1067 729
1064 734
1063 739
1060 744
1056 749
1054 754
1053 759
1050 764
1047 769
1043 774
1039 779
1034 783
1029 786
1024 791
1019 794
1014 796
1009 798
1004 799
999 802
994 803
989 804
984 806
979 806
973 806
968 806
963 806
958 806
953 806
948 806
943 805
938 802
933 801
928 798
923 796
918 794
913 793
908 792
903 790
898 787
893 783
888 779
883 776
878 774
873 770
868 767
863 762
858 759
853 757
848 753
843 749
838 747
833 743
828 737
825 732
820 728
817 723
815 718
812 713
810 708
809 703
807 698
806 693
805 688
803 683
802 678
802 673
801 668
800 663
799 658
798 653
797 648
795 643
793 638
792 633
791 628
790 623
789 618
789 613
787 608
786 603
784 597
783 592
783 587
783 582
783 577
782 572
782 567
782 562
782 557
782 552
781 547
780 542
780 537
779 532
778 527
IMAGE=D:\Peter Mayall\Images\Screen shot jpgs\35515.jpg
ID=0
LM=3
1128.00000 569.00000
1106.00000 697.00000
839.00000 749.00000
OUTLINES=1
POINTS=200
762 580
766 577
771 578
776 579
781 579
786 577
791 577
795 578
800 578
805 578
810 578
815 578
820 578
825 578
830 577
835 577
840 576
845 576
850 575
854 574
859 574
864 574
869 574
874 574
879 574
884 574
889 574
894 574
899 574
904 574
909 574
914 574
918 573
923 572
928 572
933 572
938 571
943 571
948 570
953 570
958 570
963 570
968 570
973 570
977 570
982 570
987 570
992 570
997 569
1002 569
1007 569
1012 569
1017 569
1022 569
1027 569
1032 569
1036 569
1041 569
1046 569
1051 569
1056 569
1061 569
1066 569
1071 569
1076 569
1081 568
1086 568
1091 568
1096 567
1100 567
1105 567
1110 567
1115 567
1120 568
1125 567
1128 570
1131 575
1134 580
1136 585
1136 590
1137 595
1137 599
1137 604
1137 609
1136 614
1134 619
1133 624
1132 629
1131 634
1130 639
1128 644
1127 649
1125 654
1122 659
1121 663
1119 668
1118 673
1117 678
1115 683
1114 688
1112 693
1108 698
1106 703
1103 708
1101 713
1099 718
1096 722
1095 727
1091 732
1087 736
1084 741
1083 746
1082 751
1080 756
1078 761
1075 766
1070 771
1065 775
1060 779
1056 783
1052 788
1047 792
1042 795
1037 797
1032 799
1027 801
1022 803
1017 804
1012 805
1007 805
1002 807
998 809
993 810
988 810
983 810
978 810
973 810
968 810
963 809
958 808
953 806
948 804
943 802
938 799
934 798
929 797
924 795
919 794
914 792
909 790
904 790
899 789
894 787
889 784
884 782
879 780
875 778
870 776
865 773
860 769
855 766
850 763
845 760
840 757
835 752
830 748
825 743
822 738
819 734
816 729
812 724
808 719
805 714
802 709
800 704
798 699
796 694
794 689
791 684
788 679
787 674
786 670
784 665
781 660
779 655
777 650
774 645
774 640
772 635
772 630
772 625
772 620
772 615
772 611
771 606
769 601
766 596
764 591
764 586
762 581
IMAGE=D:\Peter Mayall\Images\Screen shot jpgs\151229.jpg
ID=0
LM=3
1163.00000 560.00000
1115.00000 758.00000
802.00000 779.00000
OUTLINES=1
POINTS=200
731 549
735 548
741 548
747 547
753 547
759 549
765 550
771 550
777 550
783 549
790 549
796 549
802 550
808 551
814 551
820 551
826 550
832 550
838 550
844 550
850 550
856 550
862 550
868 551
874 553
880 554
886 554
892 555
898 555
904 555
911 555
917 555
923 555
929 554
935 554
941 554
947 555
953 556
959 556
965 556
971 556
977 556
983 556
989 556
995 556
1001 556
1007 556
1013 555
1019 555
1025 555
1032 555
1038 554
1044 553
1050 552
1056 552
1062 552
1068 552
1074 553
1080 553
1086 553
1092 553
1098 553
1104 553
1110 553
1116 553
1122 553
1128 554
1134 554
1140 554
1146 554
1153 554
1159 555
1165 558
1170 564
1171 570
1171 576
1171 582
1171 588
1171 594
1171 600
1170 606
1169 612
1171 618
1172 624
1172 630
1172 636
1171 642
1169 648
1166 654
1164 660
1163 667
1162 673
1159 679
1157 685
1154 691
1154 697
1153 703
1148 708
1145 714
1143 720
1140 726
1138 732
1135 738
1131 744
1127 750
1124 756
1120 762
1117 768
1112 774
1107 779
1100 785
1094 790
1089 796
1084 802
1078 807
1072 811
1066 817
1060 822
1054 826
1048 829
1042 832
1036 836
1030 839
1024 843
1018 846
1012 848
1006 850
1000 853
994 855
988 856
981 856
975 857
969 857
963 858
957 859
951 859
945 860
939 860
933 860
927 860
921 859
915 858
909 856
903 853
897 850
891 847
885 842
879 838
873 833
867 829
860 824
854 821
848 818
842 814
836 809
830 804
824 799
818 794
812 789
806 786
801 781
795 777
790 772
789 766
784 761
778 756
777 750
771 744
768 738
764 732
760 725
756 719
754 713
751 707
749 701
746 695
742 689
739 683
737 677
736 671
734 665
731 659
729 653
727 647
726 641
726 635
726 629
726 623
726 617
724 611
724 604
728 598
731 592
729 586
729 580
729 574
730 568
730 562
730 556
731 550
IMAGE=D:\Peter Mayall\Images\Screen shot jpgs\162250.jpg
ID=0
LM=3
1135.00000 551.00000
1112.00000 752.00000
849.00000 770.00000
OUTLINES=1
POINTS=200
756 557
761 554
767 554
772 555
778 556
783 557
789 557
794 557
800 557
805 557
811 557
816 558
821 558
827 558
832 557
838 557
843 558
849 558
854 558
860 559
865 559
870 559
876 559
881 559
887 559
892 559
898 559
903 559
909 559
914 559
920 559
925 558
930 557
936 557
941 557
947 557
952 557
958 557
963 557
969 557
974 557
980 557
985 557
990 557
996 557
1001 557
1007 557
1012 557
1018 557
1023 557
1029 555
1034 554
1040 554
1045 554
1050 556
1056 556
1061 556
1067 557
1072 558
1078 558
1083 558
1089 556
1094 556
1099 555
1105 554
1109 552
1115 552
1120 551
1126 551
1131 548
1137 550
1140 555
1143 561
1146 566
1148 571
1151 577
1152 582
1154 588
1156 593
1156 599
1157 604
1158 610
1159 615
1158 621
1160 626
1161 631
1161 637
1161 642
1161 648
1161 653
1162 659
1162 664
1162 670
1161 675
1159 681
1157 686
1155 691
1153 697
1152 702
1151 708
1149 713
1147 719
1145 724
1143 730
1141 735
1138 740
1132 744
1127 749
1121 752
1116 755
1110 759
1105 762
1099 767
1094 770
1089 776
1084 780
1079 784
1073 789
1068 793
1063 799
1059 803
1053 809
1048 813
1042 817
1037 820
1031 823
1026 823
1021 824
1015 825
1010 825
1004 826
999 826
993 827
988 827
982 827
977 827
971 827
966 825
961 824
955 822
950 822
944 820
939 819
933 817
928 814
922 811
917 809
912 806
906 803
901 801
895 798
890 796
884 792
879 789
873 787
868 784
862 779
857 775
852 771
846 767
841 764
835 761
830 757
824 752
819 748
813 743
809 738
806 732
802 727
799 722
793 716
790 711
787 705
786 700
783 694
781 689
779 683
777 678
775 672
774 667
772 662
771 656
771 651
769 645
768 640
765 634
763 629
761 623
759 618
758 613
758 607
756 602
755 596
755 591
754 585
754 580
753 574
753 569
753 563
755 558
IMAGE=D:\Peter Mayall\Images\Screen shot jpgs\190280.jpg
ID=0
LM=3
1103.00000 593.00000
1078.00000 742.00000
855.00000 767.00000
OUTLINES=1
POINTS=200
780 590
785 588
789 589
794 589
798 589
803 588
808 589
812 589
817 591
821 590
826 590
831 589
835 589
840 589
844 589
849 592
853 592
858 592
863 592
867 592
872 592
876 592
881 593
886 593
890 593
895 593
899 593
904 594
909 595
913 596
918 597
922 598
927 598
932 597
936 596
941 595
945 595
950 595
955 595
959 595
964 595
968 596
973 596
977 596
982 595
987 595
991 595
996 595
1000 595
1005 595
1010 595
1014 594
1019 594
1023 594
1028 594
1033 594
1037 593
1042 593
1046 592
1051 592
1056 592
1060 592
1065 591
1068 592
1072 590
1077 590
1081 590
1086 589
1089 591
1093 589
1097 591
1101 590
1104 590
1104 594
1105 598
1105 602
1109 607
1111 612
1112 616
1113 621
1114 625
1115 630
1115 635
1115 639
1115 644
1115 648
1114 653
1112 658
1111 662
1111 667
1109 671
1108 676
1108 681
1107 685
1105 690
1103 694
1103 699
1101 704
1100 708
1099 713
1097 717
1094 722
1092 726
1089 731
1085 736
1082 740
1077 745
1073 748
1070 752
1068 757
1066 761
1063 766
1060 770
1055 775
1052 780
1049 784
1045 788
1041 790
1036 793
1031 797
1027 800
1022 803
1018 806
1013 808
1008 810
1004 811
999 812
995 812
990 814
986 815
981 816
976 817
972 817
967 817
963 817
958 817
953 817
949 816
944 814
940 814
935 812
930 810
926 809
921 808
917 806
912 804
907 802
903 800
898 798
894 797
889 795
884 792
880 789
875 786
871 784
866 782
861 778
857 776
852 772
848 768
843 763
839 762
834 758
829 755
825 751
820 746
816 742
812 737
807 732
805 728
803 723
801 719
800 714
798 709
797 705
796 700
795 696
796 691
793 686
792 682
791 677
791 673
790 668
790 663
787 660
785 655
785 651
785 646
784 642
783 637
782 632
781 628
781 623
781 619
781 614
781 609
781 605
782 600
782 596
780 591
IMAGE=D:\Peter Mayall\Images\Screen shot jpgs\200711.jpg
ID=0
LM=3
1150.00000 608.00000
1129.00000 775.00000
879.00000 797.00000
OUTLINES=1
POINTS=200
768 608
772 606
777 604
782 604
788 604
793 603
798 603
803 603
808 605
813 605
819 602
824 602
829 603
834 603
839 603
844 603
849 602
855 602
860 601
865 601
870 601
875 603
880 604
886 604
891 604
896 604
901 605
906 605
911 605
917 605
922 606
927 606
932 606
937 606
942 605
947 606
953 606
958 606
963 606
968 606
973 605
978 605
984 605
989 604
994 604
999 604
1004 604
1009 604
1014 604
1020 604
1025 604
1030 604
1035 604
1040 603
1045 604
1051 605
1056 605
1061 605
1066 605
1071 606
1076 606
1082 607
1087 607
1092 607
1097 607
1102 607
1107 608
1112 608
1118 608
1123 607
1128 607
1132 605
1137 605
1142 606
1148 604
1150 607
1152 612
1152 617
1152 622
1152 627
1152 632
1154 638
1154 643
1154 648
1156 653
1156 658
1156 663
1156 669
1156 674
1156 679
1156 684
1156 689
1156 694
1156 699
1156 705
1156 710
1156 715
1156 720
1154 725
1153 730
1151 736
1150 741
1148 746
1148 751
1146 756
1144 761
1140 767
1137 772
1132 777
1127 782
1124 787
1121 792
1119 797
1116 803
1113 808
1108 812
1103 816
1098 819
1093 822
1087 825
1082 827
1077 829
1072 831
1067 833
1062 834
1057 837
1051 839
1046 841
1041 842
1036 843
1031 843
1026 843
1020 843
1015 843
1010 843
1005 843
1000 842
995 842
990 842
984 841
979 840
974 840
969 839
964 839
959 837
953 836
948 835
943 833
938 831
933 829
928 828
922 826
917 823
912 822
907 819
902 816
897 813
892 809
886 805
881 801
877 797
872 795
867 793
862 789
856 785
851 781
847 776
843 771
838 768
835 763
831 759
826 753
823 748
820 743
818 738
816 733
814 728
810 722
806 717
802 712
799 707
797 702
793 697
790 691
787 686
784 681
782 676
779 671
778 666
777 661
777 655
775 650
773 645
771 640
771 635
771 630
770 624
769 619
769 614
768 609
IMAGE=D:\Peter Mayall\Images\Screen shot jpgs\200717.jpg
ID=0
LM=3
1110.00000 539.00000
1099.00000 724.00000
840.00000 731.00000
OUTLINES=1
POINTS=200
787 524
792 521
797 520
802 520
807 520
812 522
817 523
819 526
825 525
830 525
835 525
840 525
845 525
850 525
855 526
860 527
865 527
870 527
875 527
880 527
885 527
890 528
896 529
901 529
906 530
911 530
916 530
921 530
926 530
931 530
936 530
941 530
946 530
951 530
956 530
961 530
967 530
972 530
977 531
982 531
986 533
991 536
996 536
1001 536
1006 536
1011 536
1016 536
1021 536
1026 536
1031 537
1037 537
1042 537
1047 537
1052 537
1057 537
1062 537
1067 537
1072 537
1077 537
1082 537
1087 537
1092 537
1097 537
1102 536
1107 535
1111 539
1114 544
1117 549
1119 554
1121 559
1122 564
1123 569
1124 574
1125 579
1126 584
1127 589
1127 594
1127 599
1127 604
1128 610
1128 615
1128 620
1128 625
1128 630
1129 635
1129 640
1129 645
1129 650
1129 655
1129 660
1129 665
1129 670
1128 675
1126 681
1125 686
1122 691
1119 696
1116 701
1113 706
1110 711
1107 716
1103 721
1098 723
1094 727
1093 732
1090 737
1087 742
1084 748
1082 753
1080 758
1077 763
1073 768
1068 772
1063 777
1058 781
1053 786
1048 789
1043 792
1038 794
1033 796
1028 799
1022 801
1017 803
1012 804
1007 804
1002 805
997 805
992 805
987 804
982 804
977 803
972 803
967 802
962 800
957 800
952 799
946 798
941 796
936 795
931 793
926 791
921 790
916 787
911 785
906 782
901 779
896 776
891 772
886 768
881 765
875 761
870 758
865 756
860 752
855 749
850 745
845 741
840 736
836 732
833 727
828 723
825 718
821 713
818 708
815 702
813 697
809 692
808 687
805 682
802 677
801 672
799 667
797 662
795 657
794 652
792 647
791 642
789 637
787 631
785 626
783 621
783 616
783 611
782 606
782 601
782 596
782 591
781 586
781 581
781 576
781 571
781 566
781 560
781 555
781 550
781 545
783 540
784 535
784 530
786 525
IMAGE=D:\Peter Mayall\Images\Screen shot jpgs\273396.jpg
ID=0
LM=3
1098.00000 523.00000
1096.00000 729.00000
862.00000 743.00000
OUTLINES=1
POINTS=200
795 538
799 535
804 535
809 535
814 535
819 535
824 535
829 535
834 535
838 535
843 534
848 534
853 533
858 533
863 533
868 533
873 533
878 532
883 531
888 531
893 531
898 531
903 531
908 531
913 532
917 533
922 533
927 533
932 533
937 533
942 533
947 533
952 533
957 533
962 533
967 533
972 533
977 533
982 532
987 531
992 530
997 529
1001 529
1006 529
1011 528
1016 528
1021 528
1026 527
1031 527
1036 527
1041 527
1046 527
1051 527
1056 527
1061 527
1066 527
1071 526
1076 525
1081 525
1085 524
1090 524
1095 524
1100 523
1103 528
1105 533
1108 538
1112 543
1114 548
1115 553
1115 558
1114 563
1116 568
1118 573
1121 578
1124 583
1125 587
1125 592
1126 597
1126 602
1126 607
1126 612
1125 617
1124 622
1123 627
1122 632
1120 637
1120 642
1120 647
1120 652
1119 657
1119 662
1118 667
1118 671
1118 676
1118 681
1117 686
1116 691
1115 696
1113 701
1110 706
1109 711
1107 716
1105 721
1101 726
1098 731
1096 736
1092 741
1089 746
1087 750
1085 755
1082 760
1079 765
1074 770
1069 774
1065 779
1060 783
1056 788
1052 793
1048 797
1043 798
1038 801
1033 804
1028 806
1023 809
1018 810
1014 810
1009 810
1004 812
999 813
994 813
989 814
984 814
979 814
974 814
969 814
964 813
959 811
954 808
949 807
944 804
939 801
935 800
930 797
925 796
920 793
915 791
910 788
905 785
900 780
895 776
890 772
885 770
880 767
875 762
871 757
866 753
861 749
857 745
853 742
850 737
847 732
845 727
841 722
838 717
835 712
834 707
832 702
830 697
829 692
827 687
826 682
825 677
823 672
822 667
822 662
821 658
820 653
819 648
818 643
817 638
815 633
814 628
814 623
812 618
811 613
810 608
809 603
808 598
807 593
806 588
806 583
806 579
805 574
805 569
804 564
803 559
802 554
800 549
798 544
795 539
IMAGE=D:\Peter Mayall\Images\Screen shot jpgs\290415.jpg
ID=0
LM=3
1122.00000 537.00000
1105.00000 769.00000
822.00000 763.00000
OUTLINES=1
POINTS=200
760 519
765 516
771 516
777 515
781 518
785 518
788 520
794 520
800 521
806 521
812 521
818 520
824 520
829 521
835 523
841 524
847 525
853 525
859 525
865 524
871 524
876 524
882 524
888 524
894 524
900 524
906 524
912 524
918 524
924 524
929 524
935 525
941 526
947 526
953 526
959 526
965 526
971 527
976 527
982 527
988 527
987 524
993 523
999 524
1005 525
1011 525
1016 525
1021 527
1026 529
1032 528
1038 529
1044 529
1050 529
1056 529
1061 529
1067 530
1073 530
1079 529
1084 529
1089 531
1095 530
1100 529
1106 531
1111 531
1117 531
1122 533
1125 539
1127 545
1130 549
1131 554
1134 560
1136 565
1138 571
1140 577
1141 583
1144 589
1145 595
1147 601
1149 607
1151 612
1151 618
1152 624
1152 630
1152 636
1152 642
1152 648
1153 654
1153 660
1153 665
1153 671
1153 677
1152 683
1151 689
1149 695
1146 701
1143 707
1141 712
1139 718
1137 724
1135 730
1132 736
1128 742
1126 748
1121 754
1117 759
1111 765
1106 771
1103 777
1099 783
1093 789
1087 793
1081 797
1076 801
1071 806
1066 812
1061 817
1055 822
1049 826
1043 831
1037 835
1031 837
1026 839
1020 840
1014 843
1008 848
1002 849
996 851
990 852
984 852
979 852
973 850
967 850
961 850
955 849
949 848
943 846
937 844
932 842
926 839
920 837
914 834
908 830
902 827
896 824
890 820
884 815
879 813
873 810
867 806
862 800
857 794
851 790
845 785
839 779
835 774
829 769
823 766
817 760
811 757
806 752
800 747
794 742
789 737
786 731
783 725
779 719
775 713
772 707
769 701
766 696
763 691
760 685
760 679
760 673
760 667
760 661
760 655
760 649
760 643
760 638
758 632
756 626
755 620
754 614
753 608
753 602
753 596
753 591
752 585
751 579
751 573
751 567
751 561
751 555
751 549
752 544
752 538
754 532
757 526
760 520
IMAGE=D:\Peter Mayall\Images\Screen shot jpgs\337493.jpg
ID=0
LM=3
1147.00000 567.00000
1089.00000 749.00000
844.00000 783.00000
OUTLINES=1
POINTS=200
765 559
769 556
775 556
780 556
786 556
791 557
796 557
802 557
807 558
812 558
818 558
823 558
829 558
834 559
839 559
845 559
850 560
855 560
861 563
866 563
872 563
877 562
882 562
888 563
893 563
898 563
904 563
909 563
915 563
920 562
925 561
931 561
936 561
941 561
947 561
952 561
958 561
963 562
968 564
974 563
979 563
984 563
990 562
995 561
1001 561
1006 560
1011 560
1017 561
1022 561
1027 561
1033 560
1038 560
1044 561
1049 562
1054 563
1060 564
1065 565
1070 565
1076 564
1081 564
1087 564
1092 564
1097 564
1103 564
1108 564
1113 563
1119 563
1124 562
1130 561
1135 560
1140 560
1146 560
1148 565
1149 571
1149 576
1149 581
1148 587
1149 592
1150 597
1149 603
1151 608
1151 614
1151 619
1151 624
1152 630
1152 635
1152 640
1152 646
1152 651
1152 657
1150 662
1148 667
1145 673
1141 678
1139 683
1136 689
1133 694
1129 699
1124 704
1120 709
1117 715
1113 720
1111 725
1107 731
1103 736
1097 741
1092 745
1090 750
1087 756
1086 761
1083 766
1079 772
1076 777
1071 783
1066 787
1061 790
1056 796
1051 801
1046 806
1040 810
1035 815
1029 820
1024 823
1019 825
1013 829
1008 831
1003 834
997 836
992 836
986 838
981 839
976 840
970 840
965 840
959 840
954 840
949 839
943 837
938 835
933 834
927 833
922 832
916 831
911 829
906 827
900 824
895 820
890 818
884 816
879 814
873 810
868 806
863 803
857 799
852 795
847 791
842 786
837 782
831 777
827 773
822 769
817 763
812 759
807 754
803 748
800 743
797 737
795 732
793 727
791 721
790 716
789 711
789 705
787 700
786 694
784 689
783 684
782 678
782 673
781 668
780 662
778 657
777 651
776 646
775 641
774 635
774 630
773 625
772 619
771 614
769 608
769 603
769 598
769 592
769 587
768 582
768 576
768 571
768 565
765 560
IMAGE=D:\Peter Mayall\Images\Screen shot jpgs\2009264.jpg
ID=0
LM=3
1153.00000 566.00000
1126.00000 743.00000
875.00000 788.00000
OUTLINES=1
POINTS=200
768 572
771 568
777 568
782 568
788 568
793 568
799 568
804 568
809 568
815 568
820 568
826 568
831 568
837 567
842 567
848 567
853 567
858 567
864 567
869 567
875 567
880 567
886 567
891 566
896 566
902 566
907 566
913 566
918 566
924 566
929 566
935 566
940 566
945 566
951 565
956 565
962 564
967 563
973 563
978 563
983 562
989 560
994 559
1000 559
1005 559
1011 559
1016 559
1022 558
1027 557
1032 557
1038 558
1043 560
1049 560
1054 560
1060 560
1065 561
1070 561
1076 561
1081 561
1087 561
1092 561
1098 561
1103 561
1109 561
1114 561
1119 560
1125 560
1130 560
1136 562
1141 562
1147 562
1152 562
1157 562
1158 568
1158 573
1159 579
1160 584
1161 590
1162 595
1163 601
1163 606
1164 611
1165 617
1168 622
1169 628
1171 633
1172 639
1172 644
1172 649
1169 655
1169 660
1168 666
1167 671
1165 677
1163 682
1162 688
1160 693
1159 698
1156 704
1154 709
1150 715
1148 720
1143 726
1139 731
1137 736
1134 742
1130 747
1124 747
1121 751
1118 757
1113 762
1107 767
1102 770
1097 774
1091 780
1086 784
1081 789
1076 794
1070 800
1065 804
1060 806
1054 810
1049 812
1043 817
1038 819
1032 820
1027 820
1021 820
1016 820
1011 822
1005 824
1000 824
994 825
989 825
983 825
978 825
973 825
967 826
962 827
956 827
951 826
945 824
940 821
934 818
929 816
924 815
918 812
913 808
907 806
902 804
896 800
891 798
886 796
880 791
875 788
869 785
864 784
858 781
853 778
847 772
842 768
837 765
831 761
828 756
823 750
818 745
813 739
811 734
808 729
803 725
800 726
800 720
797 717
796 711
793 706
790 700
788 695
786 690
783 684
782 679
777 674
776 669
772 665
770 660
768 655
767 649
767 644
767 638
767 633
767 627
767 622
768 616
769 611
770 606
770 600
771 595
771 589
771 584
771 578
768 573
IMAGE=D:\Peter Mayall\Images\Screen shot jpgs\8221072.jpg
ID=0
LM=3
1103.00000 541.00000
1087.00000 738.00000
859.00000 748.00000
OUTLINES=1
POINTS=200
769 548
769 544
774 543
779 543
784 544
789 545
794 546
799 546
804 546
809 545
814 545
819 545
824 545
829 545
834 545
839 545
844 545
848 545
853 545
858 545
863 545
868 545
873 544
878 544
883 544
888 544
893 544
898 544
903 544
908 544
913 544
918 544
923 544
928 544
933 544
938 543
943 543
948 543
953 543
958 543
963 544
968 544
973 544
978 544
983 544
988 544
993 544
998 544
1003 543
1008 543
1012 543
1017 542
1022 542
1027 540
1032 538
1037 538
1042 538
1047 537
1052 537
1057 537
1062 537
1067 537
1072 537
1077 536
1082 536
1087 536
1092 536
1097 535
1101 537
1104 542
1107 547
1109 552
1112 557
1114 562
1116 567
1119 572
1122 577
1124 582
1126 587
1126 592
1126 597
1126 602
1126 607
1126 611
1126 616
1125 621
1125 626
1124 631
1123 636
1123 641
1123 646
1123 651
1123 656
1122 661
1122 666
1121 671
1120 676
1119 681
1118 686
1115 691
1114 696
1112 701
1110 706
1108 711
1105 716
1103 721
1099 726
1095 731
1090 735
1085 740
1082 745
1078 750
1073 755
1069 760
1065 765
1060 768
1055 772
1051 776
1046 781
1041 785
1036 787
1031 789
1026 790
1021 792
1016 794
1011 796
1006 798
1001 799
996 800
991 800
986 800
981 800
976 800
971 800
966 800
961 800
956 798
951 796
946 795
941 793
936 792
931 791
926 789
921 787
916 786
911 783
906 781
901 778
896 776
891 772
887 770
882 767
877 764
872 761
867 759
862 756
857 752
852 749
847 745
842 742
837 739
832 736
827 732
823 727
818 723
815 718
812 713
808 708
804 703
802 698
800 693
798 688
795 683
793 678
792 673
790 668
788 663
787 658
784 653
781 648
781 643
780 638
777 633
775 629
775 624
774 619
774 614
773 609
771 604
770 599
769 594
769 589
769 584
769 579
768 574
768 569
768 564
768 559
768 554
770 549
IMAGE=D:\Peter Mayall\Images\Screen shot jpgs\8231073.jpg
ID=0
LM=3
1186.00000 598.00000
1160.00000 755.00000
924.00000 778.00000
OUTLINES=1
POINTS=200
833 589
835 584
838 582
843 582
848 584
853 586
858 586
862 586
867 586
872 586
877 586
882 588
887 590
892 590
897 590
902 590
907 591
912 591
917 591
921 591
926 591
931 591
936 593
941 594
946 594
951 594
956 594
961 594
966 594
971 594
976 594
981 594
985 594
990 594
995 593
1000 592
1005 592
1010 592
1015 593
1020 595
1025 595
1030 595
1035 595
1040 595
1044 595
1049 595
1054 595
1059 595
1064 595
1065 596
1069 598
1074 598
1079 596
1083 598
1088 599
1093 599
1097 599
1102 599
1107 599
1112 599
1117 599
1122 599
1127 598
1131 596
1136 597
1141 596
1143 594
1148 594
1153 593
1157 592
1162 592
1167 592
1172 593
1176 593
1181 593
1184 591
1187 596
1191 600
1194 605
1197 610
1199 615
1201 619
1203 624
1204 629
1205 634
1205 639
1205 644
1205 649
1204 654
1202 659
1202 664
1201 669
1200 674
1199 679
1198 683
1197 688
1196 693
1195 698
1194 703
1193 708
1190 713
1188 718
1186 723
1183 728
1181 733
1177 738
1174 742
1170 746
1165 749
1161 754
1156 759
1152 764
1149 769
1144 773
1139 778
1134 781
1129 784
1124 786
1119 791
1115 794
1110 797
1105 800
1100 802
1095 805
1090 809
1085 811
1080 814
1075 816
1070 817
1065 819
1060 820
1056 820
1051 820
1046 820
1041 820
1036 820
1031 820
1026 820
1021 820
1016 819
1011 818
1006 818
1001 816
996 814
992 812
987 810
982 810
977 808
972 807
967 804
962 802
957 801
952 798
947 794
942 790
937 787
933 786
928 786
923 782
918 779
913 776
908 773
903 768
899 763
895 760
890 756
885 751
881 747
878 743
874 738
870 733
867 728
862 723
858 718
856 713
852 708
849 703
846 698
843 693
840 688
839 683
838 679
837 674
836 669
835 664
835 659
835 654
835 649
835 644
835 639
835 634
835 629
835 624
835 620
835 615
835 610
835 605
835 600
833 595
833 590
IMAGE=D:\Peter Mayall\Images\Screen shot jpgs\20092612.jpg
ID=0
LM=3
1348.00000 418.00000
1356.00000 592.00000
996.00000 636.00000
OUTLINES=1
POINTS=200
927 422
933 419
939 419
945 419
951 419
957 419
963 419
969 419
975 419
981 419
987 418
993 419
999 419
1005 418
1011 418
1017 418
1023 418
1029 418
1035 418
1041 418
1047 418
1053 418
1059 418
1065 417
1071 417
1078 417
1084 417
1090 417
1096 417
1102 417
1108 417
1114 416
1120 416
1126 416
1132 417
1138 417
1144 417
1150 417
1156 417
1162 417
1168 417
1174 416
1180 416
1186 416
1192 416
1198 415
1204 415
1210 415
1216 414
1222 413
1228 413
1234 413
1240 413
1246 412
1252 412
1258 412
1264 412
1270 412
1276 412
1282 412
1288 411
1294 411
1300 411
1306 411
1312 411
1318 411
1324 411
1330 412
1336 412
1342 412
1348 412
1353 416
1357 422
1359 428
1362 434
1365 441
1368 447
1371 453
1373 459
1375 465
1378 471
1380 477
1382 483
1382 489
1382 495
1382 501
1382 507
1382 513
1382 519
1382 525
1382 531
1382 537
1380 543
1379 549
1377 555
1374 561
1371 567
1368 573
1364 579
1361 585
1359 591
1354 595
1351 601
1346 607
1341 613
1335 619
1329 624
1323 630
1319 636
1314 642
1308 648
1302 652
1296 657
1290 663
1284 667
1278 672
1272 675
1266 679
1260 682
1254 684
1248 689
1242 692
1236 694
1230 696
1224 698
1217 700
1211 702
1205 703
1199 703
1193 703
1187 703
1181 703
1175 703
1169 703
1163 703
1157 703
1151 702
1145 700
1139 700
1133 698
1127 696
1121 695
1115 694
1109 692
1103 690
1097 688
1091 685
1086 684
1080 682
1074 681
1068 678
1062 675
1056 672
1050 669
1044 666
1038 664
1032 661
1026 659
1020 655
1014 651
1008 647
1002 643
996 637
990 634
984 629
978 623
972 617
969 611
966 605
961 599
956 596
950 591
947 585
944 579
940 573
935 566
932 560
928 554
925 548
923 542
920 536
916 530
913 524
912 518
911 512
909 506
908 500
906 494
906 488
906 482
908 476
911 470
912 464
911 458
913 452
918 447
922 441
926 435
926 429
927 423
IMAGE=D:\Peter Mayall\Images\Screen shot jpgs\516200174.jpg
ID=0
LM=3
1151.00000 501.00000
1186.00000 696.00000
832.00000 766.00000
OUTLINES=1
POINTS=200
706 505
712 499
718 499
725 499
732 498
738 498
745 498
752 498
758 498
765 498
771 498
778 498
785 498
791 498
798 498
805 498
811 497
818 496
825 496
831 496
838 496
845 497
851 497
858 498
864 498
871 498
878 499
884 500
891 501
898 501
904 501
911 501
918 501
924 500
931 500
938 500
944 500
951 500
957 500
964 500
971 500
977 500
984 500
991 500
997 500
1004 500
1011 500
1017 500
1024 500
1031 500
1037 500
1044 500
1050 499
1057 499
1064 497
1070 496
1077 496
1084 496
1090 496
1097 496
1104 496
1110 496
1117 496
1124 496
1130 495
1137 495
1143 495
1150 495
1157 498
1157 504
1160 511
1162 518
1164 524
1169 531
1174 538
1179 544
1183 551
1187 558
1191 564
1193 571
1197 577
1202 584
1209 584
1215 585
1216 592
1211 599
1211 605
1211 612
1211 619
1211 625
1209 632
1208 639
1206 645
1204 652
1202 658
1199 665
1196 672
1193 678
1190 685
1187 692
1184 698
1179 705
1175 712
1169 717
1165 724
1159 728
1154 733
1148 740
1144 746
1138 753
1131 760
1126 766
1121 773
1114 780
1108 784
1101 789
1094 793
1088 796
1081 798
1074 800
1068 801
1061 804
1055 805
1048 808
1041 809
1035 810
1028 811
1021 813
1015 813
1008 814
1001 814
995 814
988 814
981 813
975 812
968 812
962 810
955 810
948 809
942 807
935 805
928 804
922 801
915 798
908 799
902 796
895 795
888 792
882 789
875 788
869 786
862 783
855 780
849 777
842 773
835 767
829 763
822 760
815 756
809 753
802 749
795 744
789 740
782 736
777 730
770 727
765 720
761 714
756 707
752 700
748 694
743 687
739 680
735 674
729 670
725 663
721 657
718 650
715 644
712 637
709 631
705 626
704 619
703 612
703 606
703 599
700 592
700 586
701 579
700 572
702 566
702 559
703 553
703 546
705 539
705 533
705 526
705 519
705 513
705 506
IMAGE=D:\Peter Mayall\Images\Screen shot jpgs\516200364.jpg
ID=0
LM=3
1196.00000 522.00000
1219.00000 710.00000
865.00000 790.00000
OUTLINES=1
POINTS=200
734 527
738 521
744 521
751 522
758 522
764 522
771 522
778 520
785 520
791 521
798 521
805 521
811 521
818 521
825 522
831 522
838 522
845 522
851 522
858 522
865 522
871 522
878 522
885 522
892 522
898 522
905 522
912 522
918 521
925 521
932 521
938 521
945 521
952 521
958 521
965 521
972 521
978 521
985 521
992 521
999 521
1005 520
1012 520
1019 520
1025 520
1032 521
1039 521
1045 520
1052 519
1059 518
1065 518
1072 518
1079 518
1085 518
1092 518
1099 518
1106 518
1112 518
1119 518
1126 518
1132 518
1139 518
1146 517
1152 517
1159 517
1166 517
1172 517
1179 517
1186 517
1193 517
1199 520
1206 525
1213 530
1218 535
1222 542
1226 549
1229 555
1233 562
1240 569
1243 575
1245 582
1247 589
1247 595
1247 602
1246 609
1245 616
1243 622
1242 629
1241 636
1240 642
1238 649
1236 656
1235 662
1234 669
1232 676
1230 682
1227 689
1225 696
1222 702
1220 709
1218 716
1214 723
1210 729
1204 736
1199 743
1194 749
1189 756
1182 763
1176 767
1169 773
1162 777
1156 782
1149 788
1146 795
1141 801
1134 807
1127 811
1120 816
1114 819
1107 822
1100 825
1094 827
1087 829
1080 830
1074 831
1067 831
1060 833
1054 834
1047 835
1040 835
1034 835
1027 835
1020 835
1013 835
1007 832
1000 832
993 831
987 830
980 829
973 829
967 827
960 824
953 824
947 822
940 819
933 817
926 815
920 814
913 812
906 810
900 806
893 804
886 802
880 796
873 793
866 790
860 789
853 785
846 781
840 776
833 771
826 769
819 763
813 757
806 753
799 747
793 746
787 739
783 732
778 727
773 720
768 713
764 708
760 701
754 695
750 689
747 682
744 675
741 668
740 662
738 655
736 648
735 642
733 635
732 628
731 622
729 615
728 608
728 602
728 595
728 588
728 582
729 575
730 568
730 561
731 555
733 548
734 541
734 535
734 528
IMAGE=D:\Peter Mayall\Images\Screen shot jpgs\516200369.jpg
ID=0
LM=3
1114.00000 578.00000
1116.00000 837.00000
773.00000 907.00000
OUTLINES=1
POINTS=200
633 581
638 576
646 578
653 578
660 577
668 576
675 576
683 575
690 575
697 574
705 574
712 573
719 573
727 572
734 572
742 572
749 572
756 572
764 572
771 572
778 572
786 573
793 573
801 573
808 573
815 573
823 573
830 572
837 572
845 572
852 573
860 573
867 573
874 573
882 573
889 574
896 574
904 574
911 572
919 572
926 572
933 573
941 575
948 575
955 575
963 575
970 574
977 573
985 573
992 571
1000 571
1007 571
1014 571
1022 571
1029 571
1036 571
1044 571
1051 571
1059 571
1066 571
1073 570
1081 570
1088 570
1095 569
1103 569
1110 569
1118 574
1121 581
1124 588
1127 596
1129 603
1130 610
1132 618
1136 625
1141 633
1144 640
1148 647
1156 649
1159 656
1162 663
1164 671
1167 678
1166 685
1165 693
1164 700
1162 708
1162 715
1162 722
1160 730
1159 737
1157 744
1156 752
1156 759
1154 767
1154 774
1152 781
1150 789
1146 796
1142 803
1136 811
1130 818
1126 826
1121 833
1118 840
1113 848
1107 855
1100 862
1094 870
1088 877
1081 885
1074 891
1068 898
1060 900
1054 907
1047 914
1039 919
1032 923
1024 926
1017 929
1010 931
1002 935
995 939
988 942
980 943
973 945
966 946
958 948
951 949
943 950
936 950
929 950
921 950
914 950
907 949
899 948
892 948
884 946
877 945
870 944
862 942
855 940
848 939
840 936
833 934
825 931
818 929
811 926
803 922
796 920
789 916
781 914
774 910
766 907
759 904
752 900
744 894
737 890
730 884
722 876
715 872
708 867
700 862
693 855
686 847
680 840
674 833
669 825
664 818
659 811
654 803
649 796
645 788
641 781
637 774
633 766
630 759
628 752
623 744
621 737
618 729
616 722
615 715
614 707
614 700
614 693
615 685
614 678
614 670
614 663
614 656
616 648
618 641
620 634
623 626
625 619
626 611
626 604
627 597
630 589
632 582
IMAGE=D:\Peter Mayall\Images\Screen shot jpgs\516200370.jpg
ID=0
LM=3
1043.00000 473.00000
1032.00000 686.00000
703.00000 756.00000
OUTLINES=1
POINTS=200
543 466
547 460
554 462
561 462
568 462
575 462
582 462
589 462
596 462
603 462
610 462
617 462
624 462
630 463
637 462
644 462
651 464
658 464
665 464
672 464
679 464
686 464
693 463
700 463
707 463
714 465
721 465
728 466
735 466
742 466
749 466
756 465
763 465
770 465
777 465
784 465
791 465
798 465
804 465
811 465
818 467
825 467
832 467
839 467
846 467
853 466
860 465
867 464
874 464
881 464
888 465
895 465
902 465
909 466
916 467
923 467
930 466
937 466
944 466
951 466
958 465
965 465
972 465
978 467
985 467
992 467
999 467
1006 466
1013 466
1020 467
1027 467
1034 468
1041 471
1046 477
1052 484
1056 491
1059 498
1064 505
1071 509
1078 513
1080 520
1080 527
1080 534
1080 541
1079 548
1077 555
1075 562
1074 569
1073 575
1070 582
1067 589
1066 596
1064 603
1063 610
1061 617
1061 624
1059 631
1057 638
1053 645
1050 652
1047 659
1045 666
1042 673
1038 680
1035 687
1032 694
1028 701
1021 707
1014 714
1008 721
1002 726
995 732
989 736
982 741
975 746
968 751
961 754
954 759
947 763
940 770
933 775
926 776
919 779
912 781
905 784
898 786
891 786
884 787
877 787
870 788
863 788
856 788
849 788
842 788
835 788
828 787
821 787
815 787
808 787
801 787
794 786
787 784
780 783
773 781
766 781
759 777
752 775
745 772
738 771
731 768
724 766
717 763
710 760
703 757
696 754
689 750
682 747
675 742
668 738
661 732
654 726
647 721
641 717
634 711
628 705
621 700
616 693
611 686
605 679
598 673
591 666
584 660
578 653
575 646
572 639
570 632
563 626
559 619
556 612
553 605
550 598
547 591
544 584
542 577
541 570
538 563
538 556
538 550
538 543
539 536
539 529
540 522
542 515
542 508
542 501
542 494
544 487
545 480
545 473
543 467
IMAGE=D:\Peter Mayall\Images\Screen shot jpgs\516200371.jpg
ID=0
LM=3
1250.00000 486.00000
1212.00000 761.00000
888.00000 780.00000
OUTLINES=1
POINTS=200
765 473
771 468
779 468
786 468
793 468
800 470
808 470
815 471
822 471
829 471
837 472
844 473
851 472
858 472
866 472
873 472
880 474
887 474
894 475
901 476
908 476
915 476
923 476
930 476
937 477
944 477
952 477
959 478
966 478
973 478
981 478
988 479
995 480
1002 480
1010 480
1017 480
1024 480
1031 480
1039 480
1046 481
1053 481
1060 481
1068 481
1072 482
1077 481
1084 480
1092 480
1099 479
1106 479
1113 479
1121 479
1128 479
1135 479
1142 478
1150 477
1157 477
1164 477
1171 479
1179 479
1186 479
1193 479
1200 479
1208 479
1215 479
1222 479
1229 479
1237 480
1244 481
1250 487
1257 489
1263 496
1268 503
1270 510
1274 517
1278 525
1282 532
1285 539
1289 546
1293 554
1295 561
1298 568
1304 571
1309 577
1309 584
1309 591
1309 598
1309 606
1309 613
1309 620
1309 627
1307 635
1305 642
1304 649
1301 656
1298 664
1295 671
1291 678
1287 685
1281 693
1276 700
1270 707
1263 712
1258 720
1252 726
1248 733
1241 736
1234 744
1228 749
1222 754
1215 759
1210 766
1204 773
1197 779
1190 783
1182 788
1175 793
1168 796
1161 801
1153 803
1146 808
1139 813
1132 817
1124 820
1117 824
1110 827
1103 829
1095 831
1088 834
1081 836
1074 838
1066 840
1059 841
1052 843
1045 843
1037 843
1030 843
1023 842
1016 841
1008 840
1001 838
994 834
987 831
979 830
972 827
965 824
958 821
950 816
943 813
936 811
929 805
921 801
914 797
907 794
900 790
892 784
885 779
878 774
871 769
863 764
856 759
849 754
842 748
836 740
829 733
823 727
817 721
810 713
805 706
802 699
799 692
794 684
789 677
785 670
782 663
777 655
774 648
772 641
769 634
765 626
762 619
760 612
758 605
754 597
751 590
751 583
751 576
750 568
750 561
750 554
751 547
753 539
754 532
756 525
758 518
758 510
758 503
760 496
761 489
763 481
765 474
IMAGE=D:\Peter Mayall\Images\Screen shot jpgs\516200377.jpg
ID=0
LM=3
1186.00000 480.00000
1179.00000 657.00000
880.00000 698.00000
OUTLINES=1
POINTS=200
777 478
778 474
784 474
789 473
795 472
801 474
807 474
813 474
818 474
824 474
830 474
836 473
842 473
848 474
853 474
859 474
865 474
871 474
877 474
882 475
888 475
894 475
900 475
906 476
911 476
917 476
923 476
929 476
935 476
940 476
946 476
952 476
958 476
964 474
970 473
975 473
981 473
987 472
993 472
999 472
1004 473
1010 473
1016 474
1022 476
1028 476
1033 477
1039 477
1045 476
1050 478
1056 478
1061 478
1067 478
1073 478
1079 477
1085 477
1090 477
1096 477
1102 477
1108 478
1114 478
1120 477
1125 476
1131 476
1137 476
1143 476
1149 474
1154 473
1160 472
1166 472
1172 472
1175 474
1178 471
1184 472
1190 476
1195 481
1199 487
1202 492
1207 498
1209 504
1212 510
1214 516
1216 522
1219 527
1220 533
1221 539
1221 545
1221 551
1222 556
1223 562
1223 568
1222 574
1221 580
1220 585
1218 591
1217 597
1215 603
1213 609
1211 614
1209 620
1206 626
1202 632
1199 638
1196 644
1192 649
1186 653
1180 658
1174 663
1168 667
1166 672
1160 677
1154 680
1148 685
1142 688
1137 691
1134 697
1128 702
1123 707
1117 711
1112 715
1106 721
1100 726
1094 729
1088 733
1082 735
1077 738
1071 740
1065 740
1059 743
1053 743
1048 745
1042 745
1036 745
1030 746
1024 747
1019 747
1013 747
1007 747
1001 747
995 746
990 746
984 745
978 742
972 742
966 742
960 740
955 738
949 736
943 733
937 731
931 728
926 726
920 723
914 720
908 717
902 714
897 712
891 708
886 702
880 699
874 696
869 693
863 689
858 684
852 680
847 674
842 670
836 665
831 660
825 654
820 650
815 644
813 639
809 634
804 630
799 624
797 618
795 613
792 607
789 601
788 595
785 589
783 584
779 578
777 572
777 566
775 560
775 555
773 549
772 543
772 537
773 531
773 525
773 520
773 514
773 508
774 502
775 496
776 491
777 485
778 479
IMAGE=D:\Peter Mayall\Images\Screen shot jpgs\516200379.jpg
ID=0
LM=3
1186.00000 633.00000
1168.00000 796.00000
899.00000 854.00000
OUTLINES=1
POINTS=200
801 642
804 639
810 639
815 638
821 638
826 638
832 638
837 637
843 637
848 637
853 637
859 638
864 639
870 639
875 639
881 639
886 639
892 639
897 639
902 639
908 639
913 639
919 639
924 639
930 639
935 639
940 639
946 639
951 637
957 636
962 636
968 636
973 636
979 636
984 636
989 636
995 636
1000 636
1006 636
1011 636
1017 636
1022 635
1028 635
1033 635
1038 636
1044 636
1049 636
1055 635
1060 636
1066 636
1071 636
1077 635
1082 636
1087 636
1093 636
1098 636
1103 634
1108 634
1114 633
1119 633
1125 633
1130 633
1135 633
1141 633
1146 633
1152 633
1157 633
1163 633
1168 633
1174 633
1179 633
1184 633
1188 637
1190 642
1193 648
1196 653
1198 659
1198 664
1199 669
1199 675
1199 680
1199 686
1199 691
1199 697
1199 702
1199 708
1200 712
1200 717
1198 723
1196 728
1196 734
1196 739
1194 745
1191 750
1190 756
1187 761
1185 766
1183 772
1181 777
1178 783
1177 788
1171 794
1166 797
1164 803
1161 808
1159 813
1156 819
1153 824
1150 830
1146 835
1142 841
1140 846
1136 852
1132 857
1128 862
1122 865
1117 870
1111 875
1109 880
1103 886
1098 888
1092 892
1087 894
1082 896
1076 898
1071 901
1065 901
1060 901
1054 904
1049 904
1044 904
1038 904
1033 904
1027 904
1022 902
1016 902
1011 901
1005 900
1000 899
995 899
989 899
984 897
978 894
973 892
967 890
962 888
956 885
951 882
946 879
940 877
935 874
929 871
924 869
918 867
913 864
907 860
902 858
897 855
891 852
886 849
880 844
875 841
869 839
864 835
858 829
853 825
850 820
844 814
839 810
833 805
830 800
826 794
823 789
820 783
817 778
814 773
811 767
808 762
806 756
804 751
802 745
801 740
800 735
798 729
797 724
796 718
795 713
795 707
795 702
795 696
795 691
796 686
797 680
798 675
798 669
800 664
801 658
802 653
802 647
801 643
IMAGE=D:\Peter Mayall\Images\Screen shot jpgs\516200381.jpg
ID=0
LM=3
1178.00000 556.00000
1187.00000 730.00000
879.00000 798.00000
OUTLINES=1
POINTS=200
764 572
768 569
774 569
780 569
785 569
791 569
797 569
803 569
809 570
815 569
821 569
826 569
832 569
838 569
844 569
850 568
856 569
862 569
867 569
873 570
879 570
885 570
891 570
897 570
903 570
908 570
914 570
920 569
926 569
932 569
938 569
944 569
949 569
955 569
961 569
967 569
973 569
979 569
985 569
991 568
996 568
1002 568
1008 567
1014 567
1020 567
1026 567
1032 567
1037 567
1043 567
1049 567
1055 568
1061 568
1067 568
1073 567
1078 567
1084 567
1090 567
1096 567
1102 566
1108 564
1114 563
1119 562
1125 561
1131 560
1137 559
1143 559
1149 558
1155 556
1160 555
1166 554
1172 553
1178 554
1182 560
1186 566
1189 572
1192 577
1194 583
1196 589
1200 595
1204 601
1208 607
1211 613
1212 618
1214 624
1215 630
1215 636
1215 642
1215 648
1215 654
1214 659
1213 665
1211 671
1211 677
1210 683
1210 689
1209 695
1207 700
1205 706
1203 712
1201 718
1196 724
1192 730
1187 736
1182 742
1178 747
1172 752
1166 757
1160 763
1157 769
1151 774
1145 778
1140 781
1134 786
1128 790
1122 796
1116 800
1110 803
1104 807
1099 809
1093 813
1087 816
1081 819
1075 822
1069 824
1063 825
1058 827
1052 828
1046 829
1040 829
1034 829
1028 829
1022 830
1017 830
1011 830
1005 830
999 830
993 830
987 830
981 830
976 829
970 828
964 827
958 826
952 825
946 824
940 823
935 821
929 821
923 820
917 818
911 817
905 814
899 811
894 810
888 808
882 804
876 801
870 799
864 798
858 796
853 792
847 788
841 784
835 779
829 774
823 768
819 762
813 756
809 751
804 746
799 740
793 736
788 730
783 725
778 719
774 714
771 708
768 702
765 696
762 690
759 684
758 678
755 673
753 667
750 661
750 655
749 649
749 643
749 637
750 632
751 626
752 620
753 614
754 608
756 602
757 596
757 591
760 585
762 579
764 573
IMAGE=D:\Peter Mayall\Images\Screen shot jpgs\516200383.jpg
ID=0
LM=3
982.00000 590.00000
995.00000 764.00000
725.00000 800.00000
OUTLINES=1
POINTS=200
640 590
645 585
650 585
655 586
660 586
666 586
671 586
676 586
681 585
686 585
691 585
696 585
701 585
706 585
711 585
717 584
722 584
727 584
732 584
737 584
742 584
747 584
752 584
757 584
762 584
768 584
773 584
778 584
783 584
788 584
793 584
798 584
803 584
808 586
813 586
819 586
824 587
829 587
834 587
839 587
844 587
849 587
854 587
859 587
864 587
870 587
875 587
880 587
885 587
890 589
895 589
900 589
905 589
910 589
915 589
921 589
926 589
931 589
936 589
941 589
946 589
951 589
956 589
961 589
966 589
972 588
977 588
982 588
987 592
991 596
993 601
995 606
997 611
999 616
1002 621
1005 627
1008 632
1012 637
1015 642
1017 647
1020 652
1022 657
1023 662
1023 667
1024 672
1024 678
1024 683
1024 688
1023 693
1022 698
1020 703
1018 708
1017 713
1017 718
1015 723
1013 729
1011 734
1009 739
1007 744
1004 749
1002 754
999 759
994 763
991 768
987 773
983 779
979 784
974 789
969 793
964 798
960 803
956 807
951 812
947 817
942 820
936 821
931 822
926 824
921 826
916 829
911 831
906 833
901 836
896 837
891 839
885 841
880 842
875 844
870 846
865 846
860 846
855 847
850 848
845 848
840 848
834 848
829 848
824 848
819 847
814 845
809 844
804 843
799 841
794 839
789 837
783 835
778 833
773 830
768 828
763 825
758 823
753 820
748 817
743 815
738 811
732 806
727 803
722 800
717 795
713 790
709 785
706 780
702 776
699 771
695 766
690 763
686 758
682 754
679 749
677 744
675 739
670 734
666 729
662 724
658 719
653 713
651 708
649 703
646 698
644 693
642 688
640 683
639 678
637 673
637 668
635 662
634 657
634 652
634 647
633 642
633 637
633 632
633 627
635 622
635 617
635 611
636 606
636 601
636 596
639 591
IMAGE=D:\Peter Mayall\Images\Screen shot jpgs\516200387.jpg
ID=0
LM=3
1144.00000 544.00000
1159.00000 749.00000
853.00000 760.00000
OUTLINES=1
POINTS=200
739 542
745 539
751 539
757 539
762 539
768 539
774 539
780 539
786 539
792 541
798 541
804 541
809 540
815 540
821 540
827 541
833 542
839 542
845 542
851 542
856 542
862 543
868 543
874 543
880 543
886 543
892 543
898 543
903 543
909 542
915 542
921 542
927 542
933 542
939 542
945 542
950 543
956 543
962 542
968 542
974 542
980 542
986 543
992 543
997 543
1003 544
1009 544
1015 544
1021 544
1027 544
1033 544
1039 543
1044 543
1050 542
1056 542
1062 542
1068 542
1074 542
1080 541
1086 540
1091 540
1097 539
1103 538
1109 537
1115 537
1121 537
1127 537
1133 538
1138 538
1144 538
1150 543
1155 548
1159 553
1160 559
1163 563
1165 568
1168 572
1173 578
1176 584
1180 588
1182 594
1185 600
1189 606
1192 612
1191 617
1193 623
1195 629
1197 635
1202 639
1202 645
1202 651
1201 657
1199 662
1198 668
1198 674
1198 680
1199 686
1199 692
1197 698
1193 704
1189 709
1187 715
1183 721
1179 727
1175 733
1170 739
1166 745
1161 751
1156 756
1150 761
1144 766
1138 772
1133 778
1127 784
1121 790
1115 793
1110 795
1104 800
1098 805
1092 808
1086 811
1080 812
1074 814
1068 817
1063 819
1057 820
1051 821
1045 822
1039 823
1033 824
1027 825
1021 825
1016 826
1010 826
1004 826
998 826
992 826
986 826
980 826
974 826
969 825
963 823
957 823
951 821
945 819
939 816
933 813
927 811
922 809
916 806
910 804
904 800
898 797
892 793
886 789
880 784
875 782
869 778
863 773
857 769
851 765
845 760
839 756
833 750
828 745
822 740
816 734
810 729
804 723
799 717
794 711
789 705
784 700
780 694
777 688
772 684
766 678
761 672
757 666
752 660
750 655
746 649
742 643
739 637
736 631
733 625
731 619
730 613
730 608
730 602
730 596
730 590
730 584
731 578
734 572
735 566
737 561
738 555
738 549
738 543
IMAGE=D:\Peter Mayall\Images\Screen shot jpgs\516200391.jpg
ID=0
LM=3
1155.00000 429.00000
1158.00000 663.00000
869.00000 683.00000
OUTLINES=1
POINTS=200
752 425
757 420
764 420
770 419
776 419
782 418
789 418
795 418
801 418
807 418
814 418
820 418
826 419
832 419
839 419
845 419
851 419
858 419
864 419
870 419
876 419
883 420
889 420
895 420
901 420
908 421
914 422
920 422
926 422
933 422
939 423
945 423
952 424
958 423
964 423
970 424
977 424
983 424
989 423
995 422
1002 420
1008 420
1014 419
1020 418
1027 418
1033 418
1039 418
1046 418
1052 420
1058 421
1064 423
1071 423
1077 423
1083 423
1089 423
1096 423
1102 423
1108 423
1114 423
1121 426
1127 426
1133 426
1140 426
1146 426
1152 427
1158 430
1165 434
1171 438
1176 444
1181 450
1185 457
1189 463
1193 469
1199 475
1203 482
1203 488
1203 494
1204 501
1204 507
1204 513
1203 519
1201 526
1201 532
1202 538
1203 544
1203 551
1205 557
1205 563
1205 569
1204 576
1202 582
1201 588
1201 595
1201 601
1201 607
1199 613
1195 620
1191 626
1187 632
1181 636
1174 643
1168 648
1165 654
1161 660
1154 667
1151 673
1145 678
1139 682
1132 687
1128 693
1122 697
1118 703
1113 709
1107 713
1101 719
1094 722
1088 725
1082 728
1076 730
1069 732
1063 735
1057 736
1051 738
1044 739
1038 739
1032 740
1025 740
1019 740
1013 740
1007 739
1000 737
994 739
988 737
982 735
975 735
969 734
963 732
957 730
950 727
944 724
938 721
931 717
925 714
919 710
913 707
906 704
900 700
894 698
889 694
882 690
876 686
870 682
865 683
858 680
855 676
849 673
842 672
836 668
831 662
825 660
819 656
814 652
808 648
803 643
796 637
790 631
786 625
780 619
775 614
769 612
765 606
762 599
759 593
756 587
753 581
750 574
748 568
745 562
744 556
744 549
743 543
743 537
742 531
742 524
742 518
742 512
742 505
742 499
742 493
742 487
744 480
746 474
745 469
741 463
740 456
740 450
741 444
744 438
746 431
751 425
IMAGE=D:\Peter Mayall\Images\Screen shot jpgs\516200396.jpg
ID=0
LM=3
1174.00000 573.00000
1126.00000 870.00000
818.00000 843.00000
OUTLINES=1
POINTS=200
730 563
737 561
744 561
751 561
757 561
764 561
771 561
778 561
785 561
792 561
799 561
805 562
812 563
819 563
826 563
833 563
840 564
847 565
853 566
860 566
867 566
874 566
881 566
888 567
895 567
901 567
908 568
915 569
922 569
929 569
936 569
943 569
949 568
956 568
963 568
970 568
977 567
983 565
989 567
996 567
1002 566
1009 567
1016 567
1023 567
1030 567
1037 567
1044 567
1050 567
1057 567
1064 567
1071 565
1078 563
1085 562
1092 561
1098 561
1105 562
1112 562
1119 562
1126 562
1133 562
1140 562
1146 562
1153 564
1160 564
1167 565
1174 565
1181 571
1184 578
1188 583
1190 590
1192 597
1195 604
1198 611
1200 618
1203 625
1206 631
1210 638
1213 645
1217 652
1220 658
1224 664
1226 671
1229 677
1229 684
1229 691
1231 698
1231 705
1231 712
1230 719
1229 725
1228 732
1228 739
1226 746
1224 753
1221 760
1218 767
1217 773
1213 780
1209 787
1204 794
1200 801
1195 808
1190 814
1183 819
1179 825
1172 832
1166 839
1159 845
1152 849
1145 854
1138 861
1132 866
1125 871
1118 876
1111 881
1104 885
1097 888
1090 891
1084 893
1077 896
1070 901
1063 904
1056 907
1049 909
1042 910
1036 912
1029 914
1022 916
1015 916
1008 917
1001 917
994 917
988 917
981 916
974 916
967 915
960 913
953 912
946 912
940 910
933 907
926 905
919 904
912 901
905 898
898 894
892 891
885 888
878 883
871 879
864 875
857 870
850 866
844 863
837 857
830 852
823 846
816 842
809 838
803 832
802 826
795 821
792 814
787 807
782 800
776 793
772 786
766 783
763 777
760 770
756 763
751 756
747 749
744 742
739 735
735 729
732 722
729 715
727 708
723 701
720 694
717 687
715 681
713 674
712 667
710 660
710 653
710 646
709 639
709 633
712 626
714 619
715 612
718 605
721 598
723 591
725 585
727 578
729 571
729 564
IMAGE=D:\Peter Mayall\Images\Screen shot jpgs\516200400.jpg
ID=0
LM=3
1196.00000 507.00000
1176.00000 747.00000
837.00000 747.00000
OUTLINES=1
POINTS=200
742 493
745 488
752 488
758 488
765 490
772 491
779 491
786 492
792 492
799 491
806 488
813 488
820 491
826 493
833 494
840 494
847 495
854 496
860 495
867 494
874 494
881 495
888 495
894 495
901 496
908 496
915 498
922 499
928 499
935 499
942 499
949 499
956 499
962 499
969 499
976 499
983 499
990 499
996 499
1003 498
1010 498
1017 498
1024 498
1030 496
1037 496
1044 499
1051 498
1058 498
1064 499
1071 499
1078 500
1085 501
1092 501
1098 502
1105 502
1112 501
1119 501
1126 502
1132 502
1139 503
1146 503
1153 504
1160 505
1166 505
1173 505
1180 503
1187 503
1194 501
1200 500
1204 507
1210 514
1214 521
1216 528
1218 534
1222 541
1224 548
1227 555
1232 562
1237 560
1244 557
1251 557
1254 564
1254 571
1252 577
1250 584
1246 591
1245 598
1243 605
1242 611
1241 618
1238 625
1238 632
1238 639
1238 645
1238 652
1236 659
1233 666
1229 673
1226 679
1223 686
1219 693
1216 700
1214 706
1211 713
1204 720
1197 726
1191 733
1186 739
1180 746
1174 751
1167 757
1162 764
1157 770
1150 775
1143 779
1136 782
1129 785
1123 787
1116 790
1109 793
1102 794
1095 797
1089 799
1082 801
1075 800
1068 804
1061 807
1055 811
1048 813
1041 814
1034 815
1027 816
1021 817
1014 818
1007 818
1000 818
993 818
987 818
980 818
973 815
966 815
959 815
953 814
946 810
939 806
932 804
925 803
919 801
912 798
905 794
898 792
891 789
885 786
878 782
871 779
864 774
857 768
851 763
844 756
838 750
831 746
824 741
818 735
811 731
804 725
797 718
790 712
785 706
778 700
773 693
768 686
764 679
758 674
754 667
750 660
743 656
742 649
740 644
739 637
737 630
734 623
731 616
730 610
727 603
727 596
727 589
726 582
726 576
724 569
724 562
725 555
728 548
729 542
732 535
733 528
735 521
736 514
738 508
741 501
742 494
IMAGE=D:\Peter Mayall\Images\Screen shot jpgs\516200406.jpg
ID=0
LM=3
1101.00000 572.00000
1043.00000 751.00000
793.00000 749.00000
OUTLINES=1
POINTS=200
727 545
726 540
731 539
737 540
742 541
747 542
752 543
757 543
763 543
768 543
773 542
778 542
783 543
789 544
794 544
799 544
804 544
809 545
815 546
819 547
823 545
827 548
832 550
838 551
843 551
848 551
853 551
858 551
864 550
869 550
874 553
879 554
884 554
890 554
895 554
900 554
905 554
910 554
916 554
921 555
926 555
931 555
936 556
942 558
947 558
952 560
957 561
962 561
968 561
973 561
978 561
983 561
988 561
994 561
999 560
1004 560
1009 560
1014 560
1020 560
1025 560
1030 560
1035 560
1040 560
1046 561
1051 561
1056 560
1061 561
1066 562
1072 562
1077 562
1082 562
1087 562
1092 563
1098 567
1101 571
1102 576
1104 581
1105 586
1107 592
1108 597
1110 602
1110 607
1110 612
1110 618
1110 623
1110 628
1109 633
1108 638
1108 644
1107 649
1106 654
1106 659
1105 664
1104 670
1101 675
1100 680
1098 685
1097 690
1094 696
1091 701
1088 706
1085 711
1079 717
1075 722
1072 727
1069 732
1066 737
1060 743
1055 744
1050 746
1045 751
1040 755
1034 760
1029 763
1024 767
1019 772
1014 776
1008 780
1003 784
998 788
993 791
988 793
982 795
977 797
972 800
967 802
962 805
956 806
951 808
946 809
941 810
936 810
930 810
925 810
920 810
915 808
910 807
904 807
899 806
894 804
889 802
884 801
878 798
873 796
868 795
863 793
858 792
852 791
847 789
842 787
837 785
832 782
826 776
821 771
816 768
811 764
806 761
800 756
795 753
790 748
785 745
780 740
774 735
769 731
765 726
761 722
756 718
750 712
746 707
742 702
738 697
735 692
733 686
730 681
728 676
725 671
723 666
721 660
720 655
718 650
716 645
714 640
713 634
711 629
710 624
710 619
710 614
710 608
710 603
710 598
711 593
712 588
714 582
715 577
717 572
719 567
721 562
723 556
726 551
728 546
IMAGE=D:\Peter Mayall\Images\Screen shot jpgs\516200416.jpg
ID=0
LM=3
1197.00000 542.00000
1194.00000 798.00000
814.00000 801.00000
OUTLINES=1
POINTS=200
701 527
705 521
713 522
720 522
727 521
734 521
742 523
749 523
756 524
763 524
771 524
778 524
785 524
792 525
800 526
807 526
814 527
821 530
829 531
836 531
843 531
850 531
858 531
865 531
872 531
879 531
887 531
894 531
901 530
908 530
916 530
923 530
930 529
937 528
945 528
952 528
959 528
966 528
974 528
981 528
988 529
996 529
1003 528
1010 528
1017 528
1025 529
1032 529
1039 529
1046 528
1054 528
1061 528
1068 528
1075 529
1083 530
1090 530
1097 530
1104 530
1112 530
1119 531
1126 533
1133 534
1141 534
1148 535
1155 535
1162 538
1170 538
1177 538
1184 538
1191 535
1198 541
1203 545
1210 551
1212 558
1218 566
1222 573
1228 578
1232 585
1238 593
1239 600
1242 607
1245 615
1247 622
1248 629
1248 636
1249 644
1249 651
1250 658
1250 665
1251 673
1251 680
1251 687
1251 694
1250 702
1248 709
1247 716
1245 723
1241 731
1238 738
1236 745
1233 752
1230 760
1225 767
1220 774
1213 780
1205 788
1200 795
1194 801
1188 807
1183 815
1176 819
1169 825
1162 830
1154 835
1147 839
1140 843
1134 849
1126 855
1119 860
1112 863
1105 867
1097 870
1090 873
1083 874
1075 876
1068 878
1061 878
1054 879
1046 883
1039 884
1032 885
1025 884
1017 884
1010 884
1003 884
996 883
988 882
981 882
974 881
967 878
959 877
952 877
945 875
938 871
930 868
923 865
916 860
909 857
901 857
894 853
887 850
880 847
872 845
865 840
858 835
851 832
843 827
836 823
830 816
823 812
815 806
808 801
801 796
793 789
787 782
781 776
774 770
766 763
761 756
754 751
749 744
744 736
739 729
733 722
726 715
722 707
718 700
713 693
708 687
706 679
702 672
699 665
698 658
697 650
695 643
693 636
690 629
689 621
689 614
690 607
692 600
694 592
695 585
698 578
702 571
704 563
704 556
705 549
704 542
701 534
701 528
IMAGE=D:\Peter Mayall\Images\Screen shot jpgs\516200419.jpg
ID=0
LM=3
1159.00000 519.00000
1118.00000 752.00000
856.00000 748.00000
OUTLINES=1
POINTS=200
741 518
747 515
753 515
759 515
765 515
771 515
777 515
783 516
788 516
794 516
800 515
806 515
812 515
818 515
824 516
830 516
836 516
842 516
848 516
854 516
860 516
866 516
871 516
877 516
883 516
889 515
895 515
901 515
907 516
913 516
919 516
925 516
931 516
937 516
943 516
949 516
954 516
960 516
966 516
972 516
978 517
984 517
990 516
996 518
1002 518
1008 518
1014 518
1020 519
1026 519
1032 519
1037 519
1043 519
1049 519
1055 519
1061 519
1067 519
1073 519
1079 519
1085 519
1091 519
1097 519
1103 519
1109 519
1115 519
1120 520
1126 521
1132 521
1138 521
1144 521
1150 521
1156 520
1162 519
1165 525
1167 530
1170 536
1173 542
1176 548
1180 554
1182 560
1182 565
1183 571
1187 575
1193 578
1195 584
1196 590
1196 596
1196 602
1196 608
1197 614
1197 620
1197 626
1196 632
1194 638
1193 643
1191 649
1190 655
1189 661
1186 667
1184 673
1182 679
1180 685
1178 691
1175 697
1172 703
1166 709
1164 715
1160 721
1155 725
1149 730
1143 734
1137 739
1131 745
1125 750
1119 753
1114 757
1108 762
1102 767
1097 772
1092 778
1086 782
1080 786
1075 789
1069 793
1063 795
1057 797
1051 799
1045 801
1039 802
1033 802
1027 803
1021 803
1015 805
1009 805
1003 806
997 806
991 806
986 806
980 806
974 805
968 805
962 802
956 801
950 799
944 799
938 797
932 794
926 791
920 788
914 785
908 782
903 780
897 778
891 774
885 771
879 768
873 765
867 762
861 757
855 753
849 749
843 745
837 740
831 735
825 731
820 726
814 721
809 715
805 709
800 703
795 697
790 691
786 685
782 679
779 673
775 667
773 661
770 655
765 649
764 644
760 638
754 632
753 626
753 620
750 614
749 608
748 602
746 596
744 590
743 584
743 578
743 572
742 566
742 561
742 555
742 549
742 543
742 537
742 531
740 525
741 519
IMAGE=D:\Peter Mayall\Images\Screen shot jpgs\516200429.jpg
ID=0
LM=3
1156.00000 547.00000
1132.00000 756.00000
888.00000 764.00000
OUTLINES=1
POINTS=200
783 562
786 560
792 559
797 560
803 563
808 563
814 563
819 565
824 566
830 566
835 565
841 565
846 565
852 565
857 565
863 565
868 565
873 564
879 564
884 564
890 564
895 564
901 564
906 564
911 564
917 564
922 563
928 563
933 563
939 563
944 563
950 563
955 563
960 560
966 560
971 560
977 560
982 560
988 560
993 560
998 560
1004 560
1009 560
1015 559
1020 560
1026 560
1031 560
1037 560
1042 558
1047 558
1053 558
1058 558
1064 558
1069 558
1075 558
1080 558
1085 558
1091 558
1096 557
1102 557
1107 557
1113 557
1118 557
1124 556
1129 555
1134 554
1140 554
1145 554
1151 551
1154 546
1158 544
1163 549
1166 554
1169 560
1170 565
1170 571
1173 576
1174 582
1176 587
1181 590
1185 587
1190 589
1193 595
1195 600
1197 606
1197 611
1197 617
1197 622
1198 627
1198 633
1198 638
1198 644
1198 649
1198 655
1198 660
1196 666
1195 671
1193 676
1191 682
1189 687
1187 693
1184 698
1180 704
1178 709
1175 714
1171 720
1168 725
1162 730
1158 734
1152 740
1147 744
1141 750
1136 755
1131 760
1125 765
1120 769
1114 775
1109 778
1103 783
1098 785
1093 788
1087 791
1082 793
1076 795
1071 796
1065 798
1060 798
1054 800
1049 801
1044 803
1038 803
1033 803
1027 803
1022 803
1016 803
1011 803
1006 803
1000 803
995 803
989 802
984 801
978 800
973 800
967 799
962 799
957 798
951 796
946 794
940 793
935 791
929 789
924 787
919 786
913 783
908 781
902 777
897 775
891 770
888 765
882 763
877 763
872 761
866 756
861 753
855 749
851 744
846 738
841 733
836 728
832 723
827 719
822 713
819 708
815 702
811 699
808 693
804 688
802 683
798 677
795 672
791 666
787 661
783 655
781 650
780 645
777 639
776 634
774 628
773 623
773 617
773 612
773 606
772 601
772 596
773 590
774 585
776 579
777 574
780 568
782 563
IMAGE=D:\Peter Mayall\Images\Screen shot jpgs\516200434.jpg
ID=0
LM=3
1131.00000 538.00000
1159.00000 716.00000
855.00000 738.00000
OUTLINES=1
POINTS=200
757 538
762 534
767 534
773 533
778 533
784 533
789 533
795 533
801 532
806 532
812 531
817 531
823 530
828 530
834 530
840 530
845 530
851 530
856 530
862 530
867 530
873 529
878 529
884 529
890 529
895 530
901 531
906 531
912 531
917 531
923 531
929 532
934 532
940 532
945 532
951 533
956 533
962 533
968 533
973 534
979 534
984 534
990 534
995 534
1001 534
1007 534
1012 534
1018 534
1023 534
1029 534
1034 534
1040 534
1046 534
1051 534
1057 534
1062 534
1068 534
1073 533
1079 533
1085 532
1090 532
1096 532
1101 532
1107 532
1112 531
1118 531
1123 530
1129 531
1133 536
1138 540
1143 546
1148 548
1154 550
1159 554
1165 559
1171 563
1176 567
1182 569
1187 573
1191 579
1195 584
1200 589
1202 595
1203 600
1203 606
1203 611
1203 617
1203 622
1203 628
1201 634
1200 639
1198 645
1198 650
1198 656
1195 661
1193 667
1191 673
1187 678
1183 684
1180 689
1176 695
1171 700
1169 706
1165 711
1161 717
1157 722
1153 727
1149 733
1146 738
1140 744
1135 747
1129 751
1123 757
1118 761
1114 767
1109 771
1103 776
1098 780
1092 785
1086 787
1081 790
1075 788
1070 791
1064 792
1059 795
1053 798
1047 800
1042 801
1036 804
1031 804
1025 805
1020 805
1014 805
1008 805
1003 805
997 805
992 804
986 803
981 802
975 801
970 799
964 797
958 796
953 794
947 792
942 791
936 789
931 787
925 785
919 783
914 781
908 778
903 776
897 772
892 770
886 767
880 764
875 760
869 756
864 752
858 748
853 744
847 739
841 735
836 730
830 724
825 720
819 715
814 710
808 705
802 699
797 695
792 689
788 684
784 678
781 673
779 667
774 661
771 656
767 650
766 645
763 639
762 634
757 628
756 623
755 617
755 611
754 606
753 600
752 595
752 589
752 584
753 578
753 572
753 567
754 561
754 556
754 550
754 545
756 539
IMAGE=D:\Peter Mayall\Images\Screen shot jpgs\516200438.jpg
ID=0
